1 **Spatial metabolomics reveal divergent cardenolide**  
2 **processing in the monarch butterfly (*Danaus***  
3 ***plexippus*) and the common crow (*Euploea core*)**

4

5 **Domenic Dreisbach<sup>1</sup>, Dhaka R. Bhandari<sup>1</sup>, Anja Betz<sup>2</sup>, Linda Tenbusch<sup>3</sup>, Andreas**  
6 **Vilcinskas<sup>3,4</sup>, Bernhard Spengler<sup>1</sup>, Georg Petschenka<sup>2</sup>**

7

8 <sup>1</sup>Institute of Inorganic and Analytical Chemistry, Justus Liebig University Giessen,  
9 Heinrich-Buff-Ring 17, 35392 Giessen, Germany

10 <sup>2</sup>Institute of Phytomedicine, University of Hohenheim, Otto-Sander-Straße 5, 70599  
11 Stuttgart, Germany

12 <sup>3</sup>Institute of Insect Biotechnology, Justus Liebig University Giessen, Heinrich-Buff-Ring  
13 26-32, 35392 Giessen, Germany

14 <sup>4</sup>Fraunhofer Institute for Molecular Biology and Applied Ecology (IME), Branch for  
15 Bioresources, Ohlebergsweg 12, 35392 Giessen, Germany

16

17

18

19 **Abstract**

20 **Although being famous for sequestering milkweed cardenolides, the mechanism**  
21 **of sequestration and where cardenolides are localized in caterpillars of the**  
22 **monarch butterfly (*Danaus plexippus*) is still unknown. While monarchs tolerate**  
23 **cardenolides by a resistant Na<sup>+</sup>/K<sup>+</sup>-ATPase, it is unclear how closely related**  
24 **species such as the non-sequestering common crow (*Euploea core*) cope with**  
25 **these toxins. Using novel atmospheric-pressure scanning microprobe matrix-**  
26 **assisted laser/desorption ionization mass spectrometry imaging, we compared**  
27 **the distribution of cardenolides in caterpillars of *D. plexippus* and *E. core*.**  
28 **Specifically, we tested at which physiological scale quantitative differences**  
29 **between both species are mediated and how cardenolides distribute across**  
30 **body tissues. Whereas *D. plexippus* sequestered most cardenolides from**  
31 **milkweed (*Asclepias curassavica*), no cardenolides were found in the tissues of**  
32 ***E. core*. Remarkably, quantitative differences already manifest in the gut lumen:**  
33 **while monarchs retain and accumulate cardenolides above plant**  
34 **concentrations, the toxins are degraded in the gut lumen of crows. We visualized**  
35 **cardenolide transport over the monarch midgut epithelium and identified**  
36 **integument cells as the final site of storage where defenses might be perceived**  
37 **by predators. Our study provides molecular insight into cardenolide**  
38 **sequestration and highlights the great potential of mass spectrometry imaging**  
39 **for understanding the kinetics of multiple compounds including endogenous**  
40 **metabolites, plant toxins, or insecticides in insects.**

41

42

43

## 44 Introduction

45 As a product of reciprocal coevolution, plants possess a plethora of defenses against  
46 herbivorous insects and other antagonists. These traits include the production of toxic  
47 secondary plant metabolites, which protect plants by affecting herbivores directly (Dussourd  
48 and Hoyle, 2000; Narberhaus et al., 2005), impair their growth and development (Ayres et al.,  
49 1997; Cresswell et al., 1992), or lower the digestibility of the plant diet (Fraenkel, 1959; Koiwa  
50 et al., 1997). Remarkably, many insects are not only able to cope with a toxic diet, but also  
51 sequester (i.e. accumulate and store) plant toxins in their body tissues to defend themselves  
52 against predators and parasitoids (Beran and Petschenka, 2022; Duffey, 1980; Opitz and  
53 Müller, 2009). Although sequestration is a widespread phenomenon among herbivorous  
54 insects including several important pests (Beran et al., 2014; Kazana et al., 2007; Robert et  
55 al., 2017; Yang et al., 2021), the underlying physiological mechanisms and especially the  
56 transport of toxins across the gut epithelium or the spatial distribution of plant toxins across  
57 insect body tissues are largely unknown.

58 The monarch butterfly (*Danaus plexippus*) is an important model for insect-plant  
59 coevolution (Agrawal et al., 2021; Karageorgi et al., 2019; Petschenka and Agrawal, 2015) and  
60 is famous for the sequestration of toxic cardenolides from its host plant milkweed (*Asclepias*  
61 spp., Apocynaceae) (Brower et al., 1968; Frick and Wink, 1995; Parsons, 1965; Reichstein et  
62 al., 1968). Cardenolides are potent inhibitors of Na<sup>+</sup>/K<sup>+</sup>-ATPase (Agrawal et al., 2012;  
63 Schatzmann, 1953), an essential cation carrier ubiquitously expressed in animal cells.  
64 Remarkably, monarch larvae sequester these toxins in high amounts and can tolerate them by  
65 means of a modified Na<sup>+</sup>/K<sup>+</sup>-ATPase, carrying a few amino acid substitutions in the cardenolide  
66 binding site of the enzyme (Dobler et al., 2012; Holzinger and Wink, 1996; Vaughan and  
67 Jungreis, 1977).

68 Despite feeding on cardenolide producing plants as well, the closely-related milkweed  
69 butterfly *Euploea core* possesses a non-resistant Na<sup>+</sup>/K<sup>+</sup>-ATPase and does not sequester  
70 cardenolides (Malcom and Rothschild, 1983; Petschenka and Agrawal, 2015). Although it is  
71 not yet understood how caterpillars of *E. core* cope with dietary cardenolides, tolerance is  
72 potentially mediated on the level of the caterpillars' gut and may involve degradation of the  
73 compounds (Petschenka and Agrawal, 2015) or epithelial barriers (Dobler et al., 2015). Using  
74 a comparative approach involving caterpillars of both species raised on the same species of  
75 milkweed, we set out to test on which physiological scale the differences in toxin distribution  
76 are mediated.

77 Cardenolides consist of a 23 C four-ring steroid skeleton bearing a five-membered  
78 lactone ring bound to C17 and are frequently attached to a sugar moiety. Approximately 200  
79 cardenolides are known from various milkweed species (Züst et al., 2019), and up to 21  
80 different cardenolides were identified in *Asclepias curassavica* (Zhang et al., 2014), one of the

81 two most important host plants of the monarch butterfly (Agrawal et al., 2021). Although  
82 sequestration in monarch butterflies was already described in the 1960s (Brower et al., 1968;  
83 Reichstein et al., 1968), it is still largely unknown how sequestration is mediated  
84 mechanistically and where cardenolides are localized in the caterpillar body. However, a  
85 comprehensive view on the spatial distribution and abundance of cardenolides across  
86 caterpillar body tissues is a prerequisite to understand the molecular mechanisms of  
87 sequestration and the function of stored defenses in ecological interactions with predators and  
88 parasitoids. Along these lines, comparisons to closely related but non-sequestering species  
89 such as *E. core*, are mandatory to reveal specific adaptations related to cardenolide  
90 sequestration in the monarch butterfly.

91 Among MSI methods, atmospheric-pressure scanning-microprobe matrix-assisted  
92 laser desorption/ionization (AP-SMALDI) MSI is one of the most advanced techniques  
93 regarding spatial resolution and sensitivity and therefore is of special interest for the spatial  
94 metabolomic characterization of complex molecular systems in the fields of chemistry, biology  
95 and medicine (Koestler et al., 2008; Kompauer et al., 2017a, 2017b; Spengler et al., 1994;  
96 Spengler and Hubert, 2002). For example, metabolite, lipid and peptide distributions were  
97 successfully visualized with spatial resolutions of up to 5  $\mu\text{m}$  on various biological surfaces and  
98 within native organisms, thereby linking molecular structures to biological functions and origins  
99 (Geier et al., 2021, 2020; Iwama et al., 2021; Kadesch et al., 2020b, 2020a, 2019; Kompauer  
100 et al., 2017b).

101 In contrast to vacuum-ionization MSI methods such as conventional MALDI and  
102 secondary ion mass spectrometry (SIMS), AP-SMALDI MSI allows experiments to be  
103 performed under near-physiological conditions (i.e. physiological temperature and pressure).  
104 Therefore, AP-SMALDI MSI overcomes vacuum-induced sample damage, loss of volatile  
105 compounds and does not require sample fixation and/or sample drying. The most recent  
106 instrumental approach in AP-SMALDI MSI eliminates height-related measurement artifacts by  
107 utilizing laser triangulation for pixel-wise autofocusing, thereby enabling the spatially-resolved  
108 molecular analysis of delicate and non-planar sample surfaces, such as the fragile epithelium  
109 of the caterpillar integument and heterogeneous tissue types of insects. To this date, the  
110 experimental bottlenecks described above had limited the application of high-resolution MSI in  
111 the field of insect research (Yang et al., 2020).

112 Taking advantage of recent AP-SMALDI MSI developments, we here set out to study  
113 the distribution of ingested and sequestered cardenolides within their native, spatial context in  
114 caterpillars of *D. plexippus* and *E. core*. We followed an MSI-based spatial metabolomics  
115 approach to study the fate of 10 cardenolides in tissue sections of both species at high lateral  
116 resolution, thus providing novel molecular insight into the process of cardenolide sequestration  
117 in *D. plexippus* and cardenolide tolerance in *E. core*. In contrast to previous work on

118 cardenolide sequestration in monarch caterpillars, our study provides detailed information on  
119 cardenolide structures, selectivity of absorption, and most importantly, the distribution of  
120 individual cardenolides across different tissues involved in the process of sequestration such  
121 as the midgut epithelium and the caterpillar integument. While cardenolides are degraded in  
122 the gut lumen of *E. core* caterpillars, they accumulate in the gut lumen of monarch caterpillars  
123 representing a novel mechanism of processing plant toxins in herbivorous insects.

124 Besides providing insight into the process of sequestration in the monarch butterfly and  
125 revealing mechanistic differences between two closely related caterpillars coping with the  
126 same class of plant toxins but having divergent ecological strategies, our study highlights the  
127 potential of high-resolution AP-SMALDI MSI emerging as a powerful platform for researchers  
128 to in-situ visualize the distribution and kinetics of metabolites in the spatial context of insect  
129 tissues and cells, with applications ranging from chemically-mediated plant-insect interactions  
130 to insecticide research.

131

132

133

134

135

136

137

138

139

140

141

142

143

144

145

146

147 **Results**

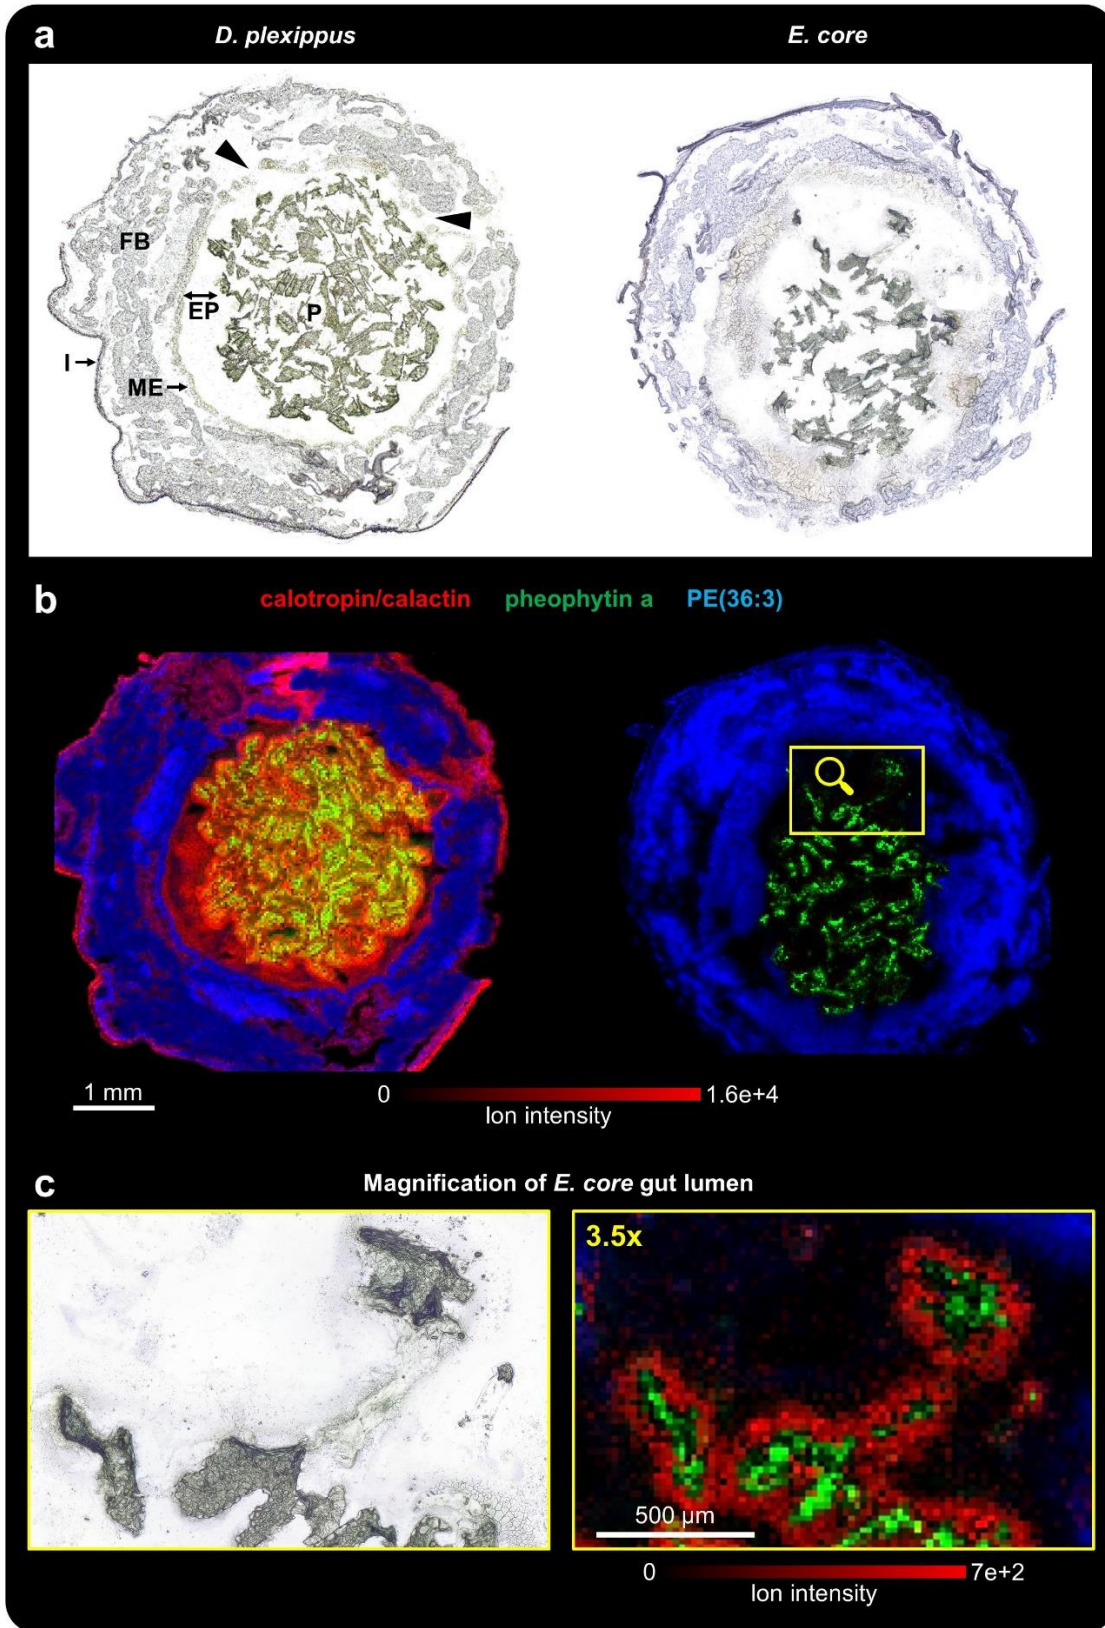

148

149 **Figure 1.** AP-SMALDI MSI of transversal sections of caterpillars of *D. plexippus* (biological replicate 1)  
150 and *E. core* (biological replicate 1). (a) Optical image of the transversal section of a fifth instar caterpillar

151 of *D. plexippus* (left) and *E. core* (right) before matrix application. P: plant material, EP: ectoperitrophic  
152 space, ME: midgut epithelium, FB: fat body, I: integument. (b) Corresponding RGB overlay images  
153 obtained with 35  $\mu\text{m}$  (*D. plexippus*) and 20  $\mu\text{m}$  (*E. core*) step size, showing the spatial distribution of the  
154 cardenolide calotropin and/or its isomer calactin ( $[\text{M}+\text{K}]^+$ , red) at  $m/z$  571.2304, the chlorophyll derivative  
155 pheophytin a at  $m/z$  909.5288 ( $[\text{M}+\text{K}]^+$ , green) as a chemical marker for plant tissue, and the animal lipid  
156 PE(36:3) ( $[\text{M}+\text{K}]^+$ , blue) as a chemical marker for animal tissues. Both RGB overlay images are  
157 normalized to the same intensity scale. The *D. plexippus* gut epithelium was damaged at two areas  
158 (highlighted in the optical image), causing potential analyte delocalization in the corresponding  
159 hemolymph area. (c) Magnification of the optical image and RGB overlay image for the highlighted area  
160 of the *E. core* gut lumen. For this ion image, the intensity scale of calotropin/calactin was adjusted to  
161 highlight the cardenolide distribution at the fringes of leaf pieces in the gut lumen of *E. core*.

### 162 **Spatial distribution of cardenolides in *D. plexippus* and *E. core***

163 AP-SMALDI MSI experiments (20  $\mu\text{m}$  and 35  $\mu\text{m}$  step size) conducted on transversal  
164 caterpillar sections (Figs. 1 and S1) revealed the presence of cardenolides throughout the body  
165 tissues of *D. plexippus* caterpillars (Fig. 1b) including the midgut epithelium, the body cavity  
166 (fat body and hemolymph), and especially the integument from where we obtained the  
167 strongest cardenolide signals. In contrast, cardenolides were entirely restricted to the gut  
168 lumen in caterpillars of *E. core* and were absent from its body tissues. Remarkably,  
169 cardenolides appeared at much higher intensities in guts of *D. plexippus* compared to guts of  
170 *E. core* when images were adjusted to the same scale. This pattern was not restricted to the  
171 isomers calotropin/calactin but also apparent for uscharidin and voruscharin (Figs. S1 and S2,  
172 not all cardenolides were compared). In total, we found 10 different cardenolides in both  
173 caterpillar species and leaves of *A. curassavica* (Tab. 1 and Fig. S3-7).

174 Notably, cardenolides (Fig. 1b at the example of  $[\text{calotropin/calactin}+\text{K}]^+$ ) were visible  
175 across the entire gut lumen of *D. plexippus* including the ectoperitrophic space (i.e. the region  
176 between the peritrophic envelope surrounding the food bolus and the midgut epithelium). In  
177 midguts of *E. core*, in contrast, they were exclusively detected at the fringes of *A. curassavica*  
178 leaf pieces (Figs. 1c and S1b) and were absent in the liquid phase of the gut lumen. In addition,  
179 to transversal sections, we carried out whole-body MSI (45  $\mu\text{m}$  step size) on longitudinal  
180 sections of final instar caterpillars and found according patterns of cardenolide distributions  
181 along the entire gut passage (Figs. 2 and S8).

182 We compared relative quantities of the five most abundant cardenolides (the  
183 indistinguishable isomers calotropin/calactin counted as one) based on MSI data *in silico*. For  
184 this purpose, we selected seven comparable regions of interest (ROI) in transversal and  
185 longitudinal sections of *D. plexippus* and *E. core* caterpillars and analyzed cardenolide  
186 intensities at the fringes of leaf pieces in the gut. According to the visual differences apparent  
187 in Fig.1 and 2, the *in silico* analysis revealed that calotropin/calactin was 6.8 x, calotoxin 2.1 x,

188 frugoside 2.6 x, and uscharidin 1.8 x more abundant in *D. plexippus* compared to *E. core* ( $p <$   
189  $0.001$ ,  $p = 0.031$ ,  $p = 0.005$ ,  $p = 0.02$ , no difference for asclepin: 1.15 x,  $p = 0.2$ ;  $n = 4$ , i.e. two  
190 transversal and two longitudinal sections from individual caterpillars per species; all t-tests  
191 assuming unequal variances, Figure S9). Notably, the analyzed regions of interest (see  
192 methods and Fig. S9) included leaf particles and their fringes where cardenolides were  
193 detectable. More distantly from the leaf fragments, the difference between the liquid phase of  
194 *D. plexippus* and *E. core* would certainly have been even more pronounced.

195 Besides local quantitative differences between the two caterpillar species, our total  
196 cardenolide estimate based on HPLC-DAD analyses (i.e. all cardenolide peaks integrated) of  
197 dissected freeze-dried gut regions (foregut, four segments of the midgut and hindgut) revealed  
198 a heterogeneous quantitative distribution of cardenolides along the gut passage in *D. plexippus*  
199 but not in *E. core*. Total cardenolide concentrations were constant across all gut regions of *E.*  
200 *core* caterpillars (foregut: FG, four sequential midgut portions: MG1-4, and hindgut: HG;  $F_{5,25}$   
201  $= 1.044$ ,  $p = 0.414$ ,  $n = 6$ ; Figs. 12 for HPLC-DAD and S13 for HPLC-MS). Contrastingly, in  
202 caterpillars of *D. plexippus*, cardenolide concentrations across all gut regions differed  
203 substantially ( $F_{5,38} = 8.312$ ,  $p < 0.001$ ;  $n = 7-9$ , see legend of Fig. S12) and the cardenolide  
204 concentration in the hindgut was lower compared to all other gut regions except of foregut and  
205 midgut region 1 (FG vs. HG:  $p = 0.577$ ; MG1 vs. HG:  $p = 0.085$ ; MG2-4 vs. HG:  $p < 0.001$ ;  
206 Tukey HSD; Fig. S20). Concentrations of gut cardenolides differed within caterpillar individuals  
207 in both species (*E. core*:  $F_{5,25} = 22.015$ ,  $p < 0.001$ ; *D. plexippus*:  $F_{8,38} = 2.352$ ,  $p < 0.037$ ).

208 When comparing total cardenolide concentrations across midgut portions (i.e. foregut  
209 and hindgut excluded) of monarch caterpillars and leaves of *A. curassavica*, we found higher  
210 cardenolide concentrations compared to milkweed leaves in midgut portions 2 and 3 ( $F_{4,32} =$   
211  $5.622$ ,  $p = 0.002$ ) and a trend of cardenolide accumulation in the central region of the midgut  
212 with concentrations of midgut portion 2 and 3 being twice as high compared to midgut portion  
213 1 ( $F_{3,24} = 5.121$ ,  $p = 0.007$ ; MG1 vs. MG2:  $p = 0.018$ ; midgut 1 vs. midgut 3:  $p = 0.01$ ; Tukey  
214 HSD; Fig. S12). In contrast, cardenolide concentrations in gut portions of *E. core* were  
215 constantly lower than in plant material except for midgut portion 4 (plant vs. FG, MG1, MG2,  
216 MG3, MG4, HG:  $p = 0.046$ ;  $0.023$ ;  $0.029$ ;  $0.01$ ;  $0.228$ ;  $0.005$ ; Tukey HSD). Relatively constant  
217 toxin concentrations across guts of *E. core* and a heterogeneous distribution in *D. plexippus*  
218 were also observed based on absolute quantification of individual cardenolides via HPLC-MS  
219 (Fig. S13).

220 Notably, the ratio of the stereoisomers calotropin and calactin in the gut passage  
221 differed substantially between both caterpillar species. Across the whole gut passage of *D.*  
222 *plexippus*, ratios of calotropin and calactin concentrations were rather constant (calotropin :  
223 calactin = 1.35; t-test,  $p = 0.15$ ; Figure S14). Contrastingly, in the gut material of *E. core*, the  
224 concentration of calotropin had an 8.15 x higher concentration relative to calactin (t-test,  $p <$



225 0.001) (Figure S14). Regionally, the largest difference in the calotropin/calactin ratio between  
 226 both species was determined in the first portion of the midgut (Figure S15). For comparison,  
 227 we also analyzed the content of both stereoisomers in leaf tissue of the host plant *A.*  
 228 *curassavica* (1.61-fold for calotropin relative to calactin, t-test,  $p = 0.05$ ) and for integument  
 229 tissue of *D. plexippus* (4.50-fold of calotropin relative to calactin, t-test,  $p < 0.001$ ;  $n = 3$  for all  
 230 comparisons) (Figure S15).

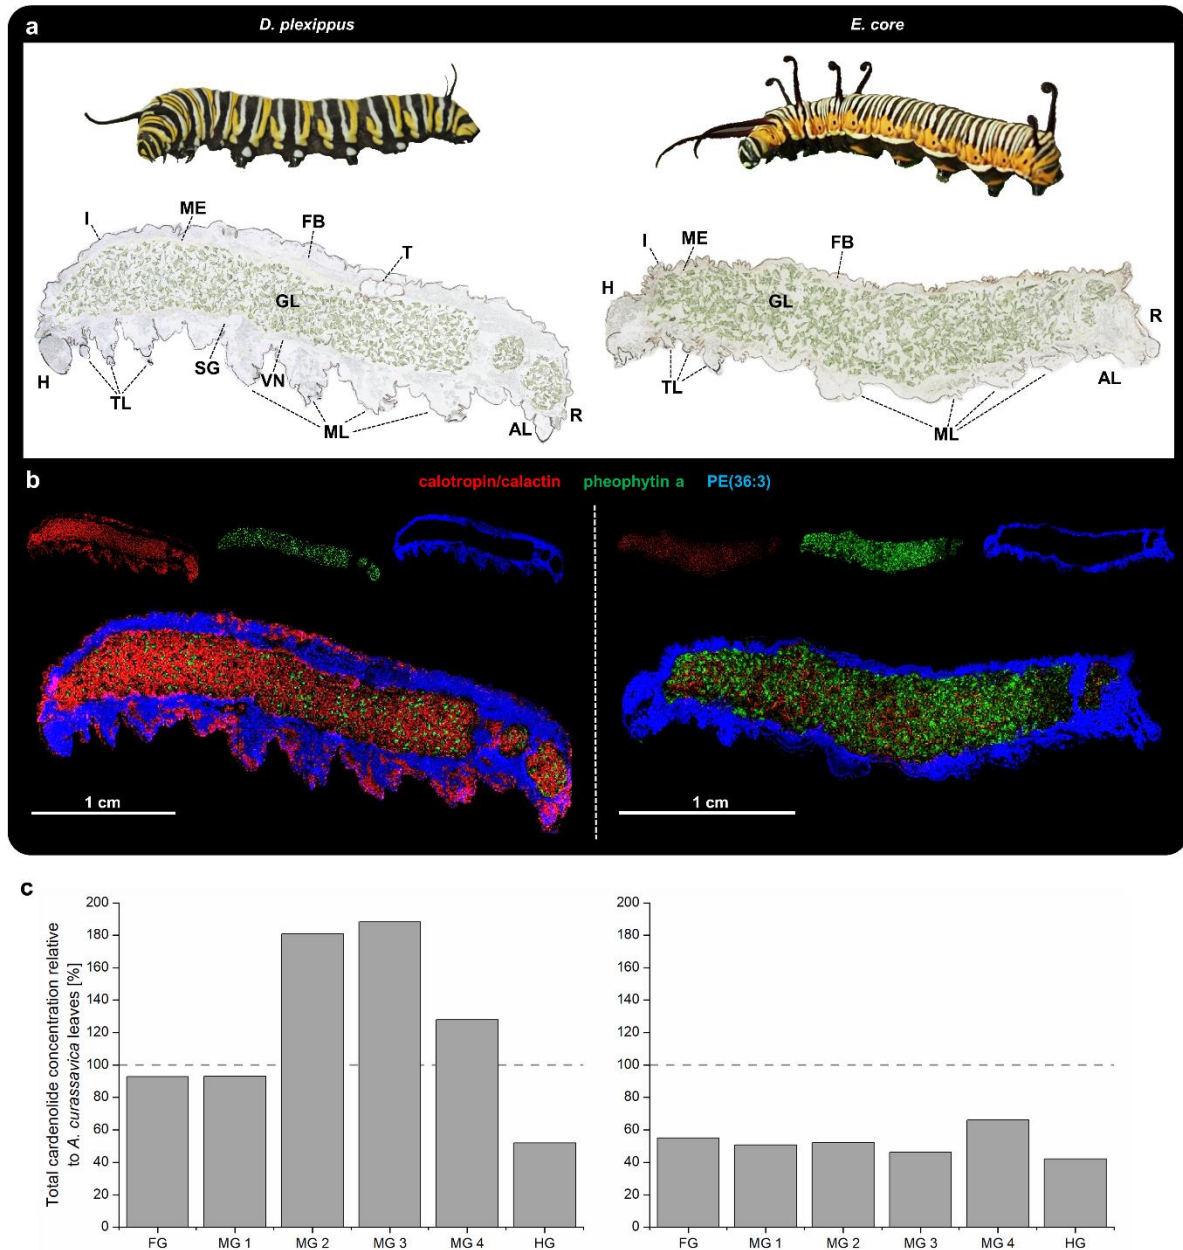

231 **Figure 2.** Whole-body AP-SMALDI MSI of fifth instar *D. plexippus* (biological replicate 3) and *E. core*  
 232 caterpillars (biological replicate 3). (a) Optical image showing live caterpillars and longitudinal *D.*  
 233 *plexippus* (left) and *E. core* (right) sections before matrix application. H: head, I: integument, TL: thoracic  
 234 legs, SG: probably salivary gland, VN: probably ventral nerve cord, ML: abdominal prolegs, AL: anal  
 235 prolegs, R: rectum, T: testis, GL: gut lumen, FB: fat body, ME: midgut epithelium. (b) Corresponding  
 236 RGB overlay images obtained with 45  $\mu\text{m}$  step size, showing the spatial distribution of calactin/calotropin  
 237 ( $[\text{M}+\text{K}]^+$ , at  $m/z$  571.2304 (red), pheophytin a ( $[\text{M}+\text{K}]^+$ , green) at  $m/z$  909.5292 to highlight ingested *A.*

238 *curassavica* plant material, and PE(36:3) ([M+K]<sup>+</sup>, blue) at *m/z* 780.4941 serving as a marker for insect  
239 tissue, such as gut epithelium and fat body. Both RGB overlay images are normalized to the same  
240 intensity scale. (c) Schematic representation of total cardenolide concentrations across the gut passage  
241 in caterpillars of *D. plexippus* and *E. core* relative to the total cardenolide concentration in *A. curassavica*  
242 leaves based on means of six (*E. core*) and nine (*D. plexippus*) dissected caterpillars and milkweed  
243 leaves. Horizontal lines indicate the cardenolide concentration in plant material (i.e. 100%). Please see  
244 Fig. S12 for a plot based on absolute quantification data.

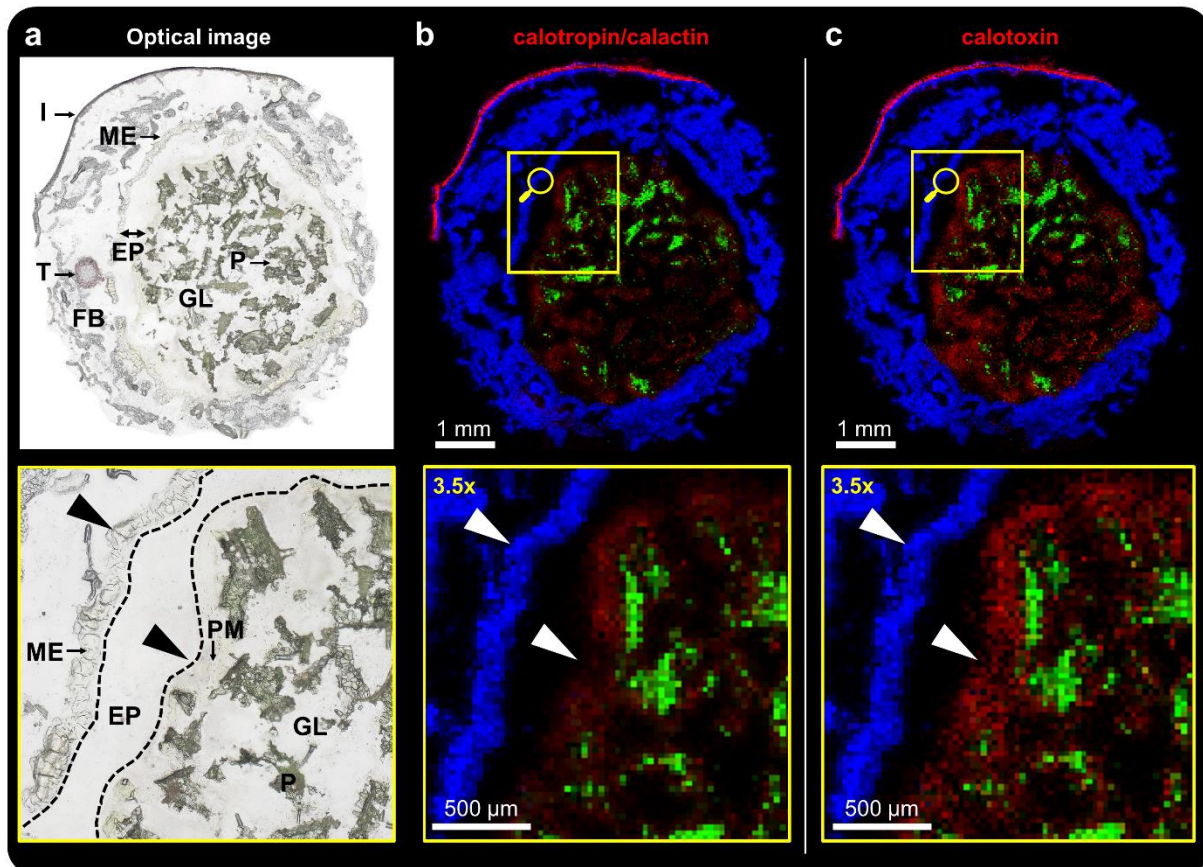

245 **Figure 3.** AP-SMALDI MSI (25  $\mu\text{m}$  step size) of *D. plexippus* (biological replicate 5), fed with the non-  
246 toxic plant *Oxypetalum coeruleum* for 3 hours before sampling. (a) Optical image of transversal *D.*  
247 *plexippus* section and magnified view of the outlined region. P: *O. coeruleum* plant material, EP:  
248 ectoperitrophic space, PM: peritrophic matrix, ME: midgut epithelium, T: testis, FB: fat body, I:  
249 integument. (b,c) Corresponding RGB overlay images and magnified views of the outlined region in a,  
250 showing (b) calactin/calotropin ([M+K]<sup>+</sup>, red) at *m/z* 571.2304 and (c) calotoxin ([M+K]<sup>+</sup>, red) at *m/z*  
251 587.2251 and (b,c) pheophytin a ([M+K]<sup>+</sup>) at *m/z* 909.5292 as a chemical marker for plant tissue in  
252 green and PE(36:3) ([M+K]<sup>+</sup>) at *m/z* 780.4942 as a chemical marker for insect tissue is shown in blue.

### 253 Retention of cardenolides in the gut lumen of *D. plexippus*

254 Based on our observation on cardenolide accumulation in guts of *D. plexippus*, we tested the  
255 hypothesis that cardenolides are retained in the midgut lumen of *D. plexippus* caterpillars. For  
256 this purpose, we analyzed last instar caterpillars of *D. plexippus* which were raised on *A.*

257 *curassavica* but were fed with the cardenolide-free plant *Oxypetalum coeruleum* (Warashina  
258 and Shirota, 2021) for three hours before sampling using AP-SMALDI MSI. Remarkably, even  
259 after several rounds of purging with cardenolide-free *O. coeruleum*, we still detected  
260 cardenolides in the gut lumen. The preferentially-sequestered cardenolides calotropin/calactin  
261 (Fig. 3b), calotoxin (Fig. 3c), calotropagenin (Fig. S16a) and frugoside (Fig. S16b), as well as  
262 uscharidin (Fig. S16c), which is the dominant cardenolide in *A. curassavica* leaves, were still  
263 present in the interstices between the *O. coeruleum* leaf particles in the gut although at lower  
264 abundance compared to a caterpillar freshly harvested from *A. curassavica* (see Fig. 1, Fig.  
265 S17; representative MSI-based relative quantification between biological replicate 1 and  
266 biological replicate 5 showed 2.7 x, 1.1 x, 2.1 x reduction for calotropin/calactin, calotoxin, and  
267 frugoside, respectively; t-test,  $p < 0.001$  for all comparisons; see Fig. S17 legend for details  
268 regarding *in silico* quantification). Notably, the dominant *A. curassavica* leaf cardenolides,  
269 voruscharin, uscharin and asclepin were not detected anymore. Thus, our data suggest that  
270 sequestered cardenolides are retained in the gut lumen and are not moving linearly along with  
271 the gut contents.

272 In contrast to monarch caterpillars that were analyzed directly after feeding on *A.*  
273 *curassavica* (Fig. 1), it was not possible to detect any cardenolide signals in the ectoperitrophic  
274 space, gut epithelium and hemolymph (see magnified view of the highlighted ROI in Figs. 3  
275 S16 and S18), suggesting rapid clearance of cardenolides distributed in the caterpillars' body  
276 fluids. For *E. core*, we did not detect any cardenolides after purging the gut lumen overnight  
277 with the cardenolide-free plant *O. coeruleum* (Fig. S18).

### 278 **Selectivity, modification and storage of cardenolides in *D. plexippus***

279 We studied the selectivity of sequestration as well as the transport and storage of sequestered  
280 cardenolides by MSI experiments with a higher spatial resolution (5  $\mu\text{m}$  step size) to improve  
281 resolution on the tissue level. Despite being minor components in *A. curassavica* leaves (Fig.  
282 S19 for LC-MS-based quantification), calotropin/calactin (Fig. 4b), frugoside (Fig. S20b), and  
283 calotoxin (Fig. S20c) were the most abundant cardenolides in the gut lumen and integument  
284 of the monarch caterpillar. In contrast, although being one of the most abundant cardenolides  
285 in *A. curassavica* (LC-MS based quantification revealed 5.8 x higher concentration relative to  
286 calotropin,  $n = 3$ ; Fig. S19), asclepin was exclusively detected at the fringes of the leaf particles  
287 in the gut lumen and was not sequestered into the body tissues (Fig. 4c).

288 Sequestered cardenolides were primarily stored in the epithelial cells of the integument  
289 (Figs. 4 and S20) and not in the cuticle (see ref. 51 for a histological section of monarch  
290 integument). While uscharidin and voruscharin were the dominant cardenolides in *A.*  
291 *curassavica*, their concentration in the integument was 5.2 x and 50 x lower compared to  
292 calotropin ( $n = 3$ ; Fig. S19). However, although only at low amounts, we were able to visualize

293 both toxins in the monarch caterpillar integument (Fig. S20e,f). Interestingly while not showing  
294 signals in the gut lumen, calotropagenin, which was the cardenolide with the lowest  
295 concentration in *A. curassavica* leaves (Fig. S19), was detected in the *D. plexippus* integument  
296 (Fig. S27a). Despite being an abundant compound in *A. curassavica* (Fig. S19) like asclepin,  
297 the biglucoside uzarin was not sequestered by monarch caterpillars (Fig. S20f).  
298

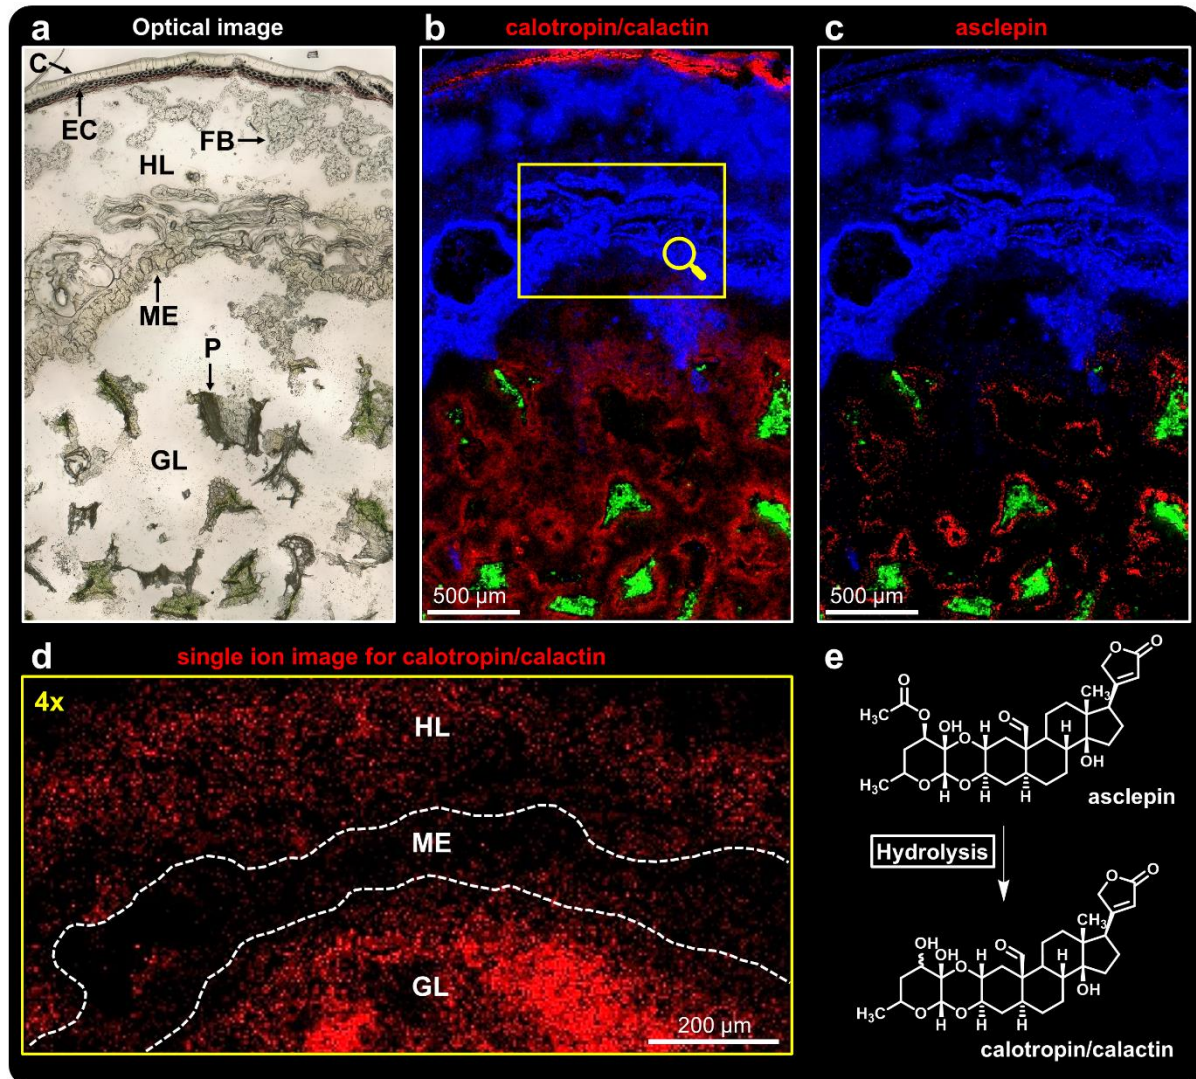

299 **Figure 4.** High-resolution AP-SMALDI MSI (5  $\mu\text{m}$  step size) of a transversal *D. plexippus* (biological  
300 replicate 7) section. (a) Optical image of the analyzed region of interest. C: cuticle, EC: epidermal cells,  
301 HL: hemolymph, FB: fat body, ME: midgut epithelium, GL: gut lumen, P: *A. curassavica* plant material.  
302 (b,c) RGB overlay images showing the spatial distribution of (b) calactin/calotropin ( $[[M+K]^+$ , red) at  $m/z$   
303 571.2304, (c) asclepin ( $[[M+K]^+$ , red) at  $m/z$  613.2427, and (b,c) pheophytin a ( $[[M+K]^+$ , green) at  $m/z$   
304 909.5290 and PE(36:3) ( $[[M+K]^+$ , blue) at  $m/z$  780.4940. (d) Magnified view (4x) of the region outlined in  
305 b, showing the single-ion image for calactin/calotropin ( $[[M+K]^+$ ) in red. Due to the high ion intensity in  
306 the integument, the intensity scale for this image was adjusted to visualize cardenolides in the midgut  
307 epithelium. (e) Putative degradation pathway of asclepin in *D. plexippus* gut.  
308

309           Sequestration of plant toxins is generally assumed to be mediated via the epithelium of  
310 the midgut (Beran and Petschenka, 2022). In line with this prediction, we were able to detect  
311 calotropin/calactin with low abundance in the midgut epithelium of our transversal sections  
312 (Fig. 4d). We also monitored the distribution of cardenolides at the interface gut lumen, midgut  
313 epithelium, and hemolymph based on longitudinal caterpillar sections to address the molecular  
314 transport process in a larger spatial environment (Fig. 5). Here, we were able to visualize the  
315 spatial distribution of the dominant sequestered cardenolides calactin/calotropin (Fig. 5b),  
316 frugoside, (Fig. S21b) and calotoxin (Fig. S21c) within the epithelial tissue of the monarch  
317 midgut. In agreement with the putative role of the midgut epithelium as the transport organ for  
318 sequestered toxins mediating selectivity, the cardenolides uzarin (Fig. 5c) and asclepin (Fig.  
319 S21d) which were absent from the body cavity (i.e. not sequestered), were also not detected  
320 within the layer of midgut cells although they were present in the gut lumen. The cardenolide  
321 composition of the midgut epithelium tissue was further validated by LC-MS/MS experiments  
322 (Table 1).

323           In addition, our high-resolution MSI analyses revealed that sequestered cardenolides  
324 appear in the monarch gut epithelium in a discrete, granular pattern, which was maintained  
325 after dispersion in the hemolymph (Figs. 5b, S21b,c). Notably, this pattern does not only apply  
326 to the distribution of cardenolides but also to other metabolites (Fig. S21, e.g. kaempferol-  
327 glucopyranoside, a ubiquitous plant secondary compound also occurring in milkweed).

328           We compared the distribution of cardenolides with the distribution of primary and other  
329 secondary metabolites, such as kaempferol-glucopyranoside (Fig. S21e), malvidin-glucoside  
330 (Fig. S21f), N-(1-deoxy-1-fructosyl)tyrosine (Fig. S21g), guanosine (Fig. S21h for *D. plexippus*  
331 and Fig. S22c for *E. core*) and unidentified disaccharides (Fig. S21i for *D. plexippus* and Fig.  
332 S22d for *E. core*) within the midgut epithelial tissue of *D. plexippus* and *E. core*. For both  
333 species, we observed spatial distributions similar to sequestered cardenolides in the monarch  
334 regarding the extraction from plant material and the transport across the gut epithelium.  
335 Therefore, utilizing the high spatial resolution ( $\leq 10 \mu\text{m}$ ) provided by the AP-SMALDI MSI  
336 system, we were able to reveal the spatial organization of metabolite uptake at the sub-tissue  
337 level.

338

339

340

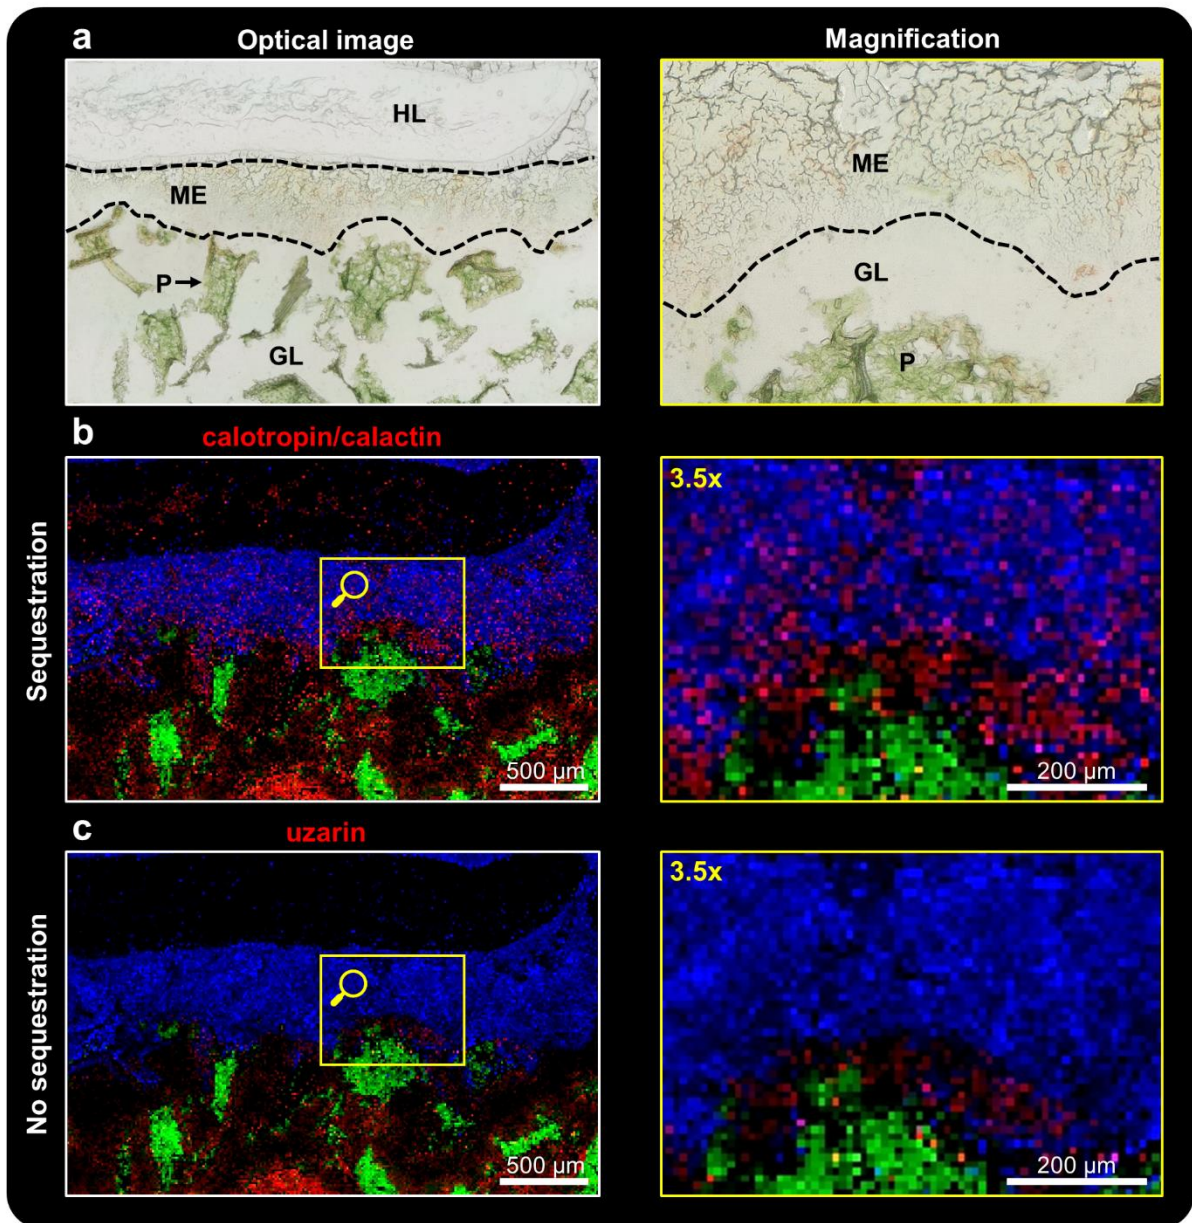

341 **Figure 5.** High-resolution AP-SMALDI MSI (10  $\mu\text{m}$  step size) of a longitudinal *D. plexippus* (biological  
342 replicate 3) section. (a) Optical image of the analyzed region of interest and magnified view (3.5x) of the  
343 outlined region in b,c. P: *A. curassavica* plant material, GL: gut lumen, ME: midgut epithelium, HL:  
344 hemolymph. (b,c) RGB overlay images and magnified view of the outlined region showing the spatial  
345 distribution of calactin/calotropin ( $[\text{M}+\text{K}]^+$ , red) at  $m/z$  571.2304 in (b), uzarin ( $[\text{M}+\text{K}]^+$ , red) at  $m/z$   
346 737.3149 in (c), pheophytin a ( $[\text{M}+\text{K}]^+$ , green) at  $m/z$  909.5290 and PE(36:3) ( $[\text{M}+\text{K}]^+$ , blue) at  $m/z$   
347 780.4940.

348  
349  
350  
351

352 **Table 1.** Overview of the 10 different cardenolides (Figure S8 for chemical structures) detected  
 353 in *A. curassavica* leaves, gut content and various tissue types of *D. plexippus* and *E. core* (MG:  
 354 midgut) using AP-SMALDI MSI and complementary LC-MS experiments. Note that native *A.*  
 355 *curassavica* leaves were not analyzed via AP-SMALDI MSI.

| Compound       | <i>A. curassavica</i><br>leaf | <i>D. plexippus</i><br>gut content | <i>E. core</i><br>gut content | <i>D. plexippus</i><br>MG epithelium | <i>D. plexippus</i><br>integument | <i>E. core</i><br>integument |
|----------------|-------------------------------|------------------------------------|-------------------------------|--------------------------------------|-----------------------------------|------------------------------|
| calotropagenin | + <sup>a</sup>                | + <sup>a,b</sup>                   | + <sup>a</sup>                | + <sup>a</sup>                       | + <sup>a,b</sup>                  | - <sub>a,b</sub>             |
| uscharidin     | + <sup>a</sup>                | + <sup>a,b</sup>                   | + <sup>a,b</sup>              | + <sup>a</sup>                       | + <sup>a,b</sup>                  | - <sub>a,b</sub>             |
| calotropin     | + <sup>a</sup>                | + <sup>a,b</sup>                   | + <sup>a,b</sup>              | + <sup>a,b</sup>                     | + <sup>a,b</sup>                  | - <sub>a,b</sub>             |
| calactin       | + <sup>a</sup>                | + <sup>a,b</sup>                   | + <sup>a,b</sup>              | + <sup>a,b</sup>                     | + <sup>a,b</sup>                  | - <sub>a,b</sub>             |
| frugoside      | + <sup>a</sup>                | + <sup>a,b</sup>                   | + <sup>a,b</sup>              | + <sup>a,b</sup>                     | + <sup>a,b</sup>                  | - <sub>a,b</sub>             |
| calotoxin      | + <sup>a</sup>                | + <sup>a,b</sup>                   | + <sup>a,b</sup>              | + <sup>a,b</sup>                     | + <sup>a,b</sup>                  | - <sub>a,b</sub>             |
| asclepin       | + <sup>a</sup>                | + <sup>a,b</sup>                   | + <sup>a,b</sup>              | - <sub>a,b</sub>                     | - <sub>a,b</sub>                  | - <sub>a,b</sub>             |
| uscharin       | + <sup>a</sup>                | + <sup>a,b</sup>                   | + <sup>a</sup>                | + <sup>a</sup>                       | + <sup>a,b</sup>                  | - <sub>a,b</sub>             |
| voruscharin    | + <sup>a</sup>                | + <sup>a,b</sup>                   | + <sup>a</sup>                | + <sup>a</sup>                       | + <sup>a,b</sup>                  | - <sub>a,b</sub>             |
| uzarin         | + <sup>a</sup>                | + <sup>a,b</sup>                   | + <sup>a,b</sup>              | - <sub>a,b</sub>                     | - <sub>a,b</sub>                  | - <sub>a,b</sub>             |

+<sup>a</sup>: Detected via HPLC-MS      +<sup>a,b</sup>: Detected via HPLC-MS and AP-SMALDI MSI      -<sub>a,b</sub>: No detection via HPLC-MS and AP-SMALDI MSI

356

357

## 358 Discussion

359 The demand for spatially-characterized biochemistry and molecular biology has grown  
360 rapidly over the recent years (Buchberger et al., 2018; Joo et al., 2008; Kherlopian et al., 2008;  
361 Spengler, 2015; van Hove et al., 2010). Traditional methods, such as immunofluorescence,  
362 require the labelling of biomolecules with fluorophores, which can be time-consuming,  
363 inefficient and is restricted to individual pre-known compounds (Yang et al., 2020). Moreover,  
364 labelling of molecules will most likely alter their physicochemical properties and therefore  
365 influence their tissue distribution. Despite its great potential, matrix-assisted laser  
366 desorption/ionization (MALDI) MSI was only rarely employed to study sequestration of plant  
367 toxins in insects (see Abdalsamee et al., 2014).

368 Our MSI-based spatial metabolomics approach allows for spatially-resolved,  
369 qualitative, and semi-quantitative analyses of metabolites and lipids in an untargeted fashion  
370 in their native state. We visualized diverging strategies of two closely-related milkweed butterfly  
371 species regarding the processing and uptake of plant toxins in the gut as well as the storage  
372 of sequestered compounds for defense. First, we demonstrated that the midgut lumen as the  
373 first physiological layer to mediate selectivity, plays a vital role concerning how *D. plexippus*  
374 and *E. core* cope with a toxic cardenolide diet. In contrast to the gut lumen of *D. plexippus*  
375 where cardenolides were found over the entire lumen, no extracted cardenolides were  
376 observed in between the leaf particles in the gut lumen of *E. core*; instead, cardenolides were  
377 exclusively detected at the fringes of ingested leaf material (Figs. 1, S1 and S2). This pattern  
378 most likely suggests immediate degradation of cardenolides extracted from plant material. We  
379 suggested degradation of cardenolides in *E. core* based on analyzed gut contents earlier  
380 (Petschenka and Agrawal, 2015) and the visualized lack of cardenolides in the liquid phase of  
381 the gut strongly supports our hypothesis and shows that degradation happens directly in the  
382 midgut lumen.

383 Whole-body MSI on longitudinal caterpillar sections and complementary HPLC-MS and  
384 HPLC-DAD experiments based on segments from freeze-dried caterpillar guts allowed for  
385 tracking cardenolides along the caterpillar gut passage. Specifically, we found that  
386 cardenolides accumulated in the midgut of *D. plexippus* while the concentration dropped in the  
387 hindgut, suggesting a hitherto undescribed mechanism of toxin partitioning in the monarch gut  
388 (Figs. 2, S8, S12 and S13). In contrast, for *E. core*, we detected constant cardenolide  
389 concentrations along the gut passage including the hind gut (Figs. 2, S12 and S13). These  
390 observations indicate that cardenolides are selectively retained in the monarch gut lumen  
391 resulting in higher local concentrations of preferentially-sequestered cardenolides, such as  
392 calotropin, calactin, frugoside. We speculate that the accumulation of cardenolides in the  
393 midgut creates a steep concentration gradient supporting efficient sequestration.

394



395 We conducted MSI experiments with caterpillars fed with the cardenolide-free diet *O.*  
396 *coeruleum* to purge their guts from milkweed cardenolides to further address the hypothesis  
397 of cardenolide retention in the monarch caterpillar gut. Consistently with our prediction,  
398 calotropin/calactin, frugoside and calotoxin were still abundant between *O. coeruleum* leaf  
399 particles in the gut lumen of monarch caterpillars, while in the gut lumen of *E. core*, no  
400 cardenolides were detected anymore after feeding on *O. coeruleum* leaves (Figs. 3, S16 and  
401 S18). We propose a mechanism analogous to adsorption chromatography, retaining  
402 cardenolides in the gut lumen while the food contents are passing by and are defecated. How  
403 this could be mediated mechanistically remains an open question and it is interesting to note,  
404 that the spatial distribution of cardenolide MSI signals seems to resemble the shape of the *O.*  
405 *coeruleum* leaf particles suggesting adhesion of cardenolides to *O. coeruleum* leaf particles in  
406 the gut lumen. Moreover, after purging there were no cardenolides detected anymore in the  
407 ectoperitrophic space which showed strong intensities in caterpillars actively feeding on *A.*  
408 *curassavica* (Fig. 1). This observation may indicate removal of cardenolides by sequestration  
409 via the midgut epithelium. Similarly, the body cavity was free of cardenolides suggesting rapid  
410 clearance once the supply from the gut lumen is halted.

411 Besides differences in the distribution, we also observed striking differences regarding  
412 the structural composition of cardenolides in the midgut of both caterpillar species.  
413 Remarkably, the stereoisomer ratio of calotropin/calactin in the *E. core* gut lumen (24:1)  
414 differed significantly from that found in the monarch gut lumen (1.2:1) and *A. curassavica*  
415 leaves (1.6:1; Figs. S14 and S15). Based on the inhibition of Na<sup>+</sup>/K<sup>+</sup>-ATPase, calactin was  
416 reported to be > 3x more toxic for *E. core* than its stereoisomer calotropin (Petschenka et al.,  
417 2018). Hence, we suggest that *E. core* prevents cardenolide intoxication by minimizing the  
418 concentration of calactin in the midgut which could be either mediated by converting calactin  
419 into a structurally different cardenolide, by degradation, or by prevention of calactin production  
420 from uscharidin contained in the ingested plant material (Seiber et al., 1980). Along the same  
421 lines, monarch caterpillars could maintain a high concentration of highly toxic calactin for  
422 defense.

423 Unlike calactin, calotropin, and frugoside, the predominant cardenolides in *A.*  
424 *curassavica* leaves, uscharidin, asclepin, voruscharin and uscharin, do not belong to the  
425 preferentially-sequestered cardenolides of the monarch, despite having high structural  
426 similarity to calotropin and calactin and sharing the same aglycon (calotropagenin) (Figs. 4,  
427 S19, S20). Surprisingly, asclepin, which only differs from calotropin/calactin by having an  
428 acetoxy-group (-OAc) instead of a hydroxy-group (-OH) in the sugar moiety, is not sequestered  
429 and instead, was exclusively detected at fringes of ingested *A. curassavica* leaf material (Fig.  
430 4c). Given the high structural similarity to calotropin/calactin, it seems puzzling that the  
431 molecular mechanism underlying sequestration prohibits the uptake of asclepin. More likely,

432 asclepin might be rapidly converted into calactin and/or calotropin instead of being not  
433 sequestered (Fig. 4e).

434         Similar observations regarding the metabolic conversion of structurally-related  
435 cardenolides into calotropin and calactin by the monarch caterpillar were already made  
436 decades ago for uscharidin (Marty and Krieger, 1984; Seiber et al., 1980) and recently, for  
437 voruscharin by Agrawal et al. (2021). Interestingly, both, uscharidin and voruscharin occurred  
438 at similar concentrations in *A. curassavica* leaves like asclepin, (Fig. S19), but were very  
439 abundant in the monarch gut lumen (Fig. S20e,f). Consequently, we hypothesize that the  
440 conversion rate of asclepin into calactin and/or calotropin is significantly higher compared to  
441 uscharidin and voruscharin, suggesting a passive mechanism such as gut pH as observed for  
442 voruscharin (Agrawal et al., 2021) and not an involvement of enzymes as it was shown for  
443 uscharidin (Marty and Krieger, 1984).

444         The monarch  $\text{Na}^+/\text{K}^+$ -ATPase shows up to 94-fold higher resistance against  
445 cardenolides compared to non-adapted  $\text{Na}^+/\text{K}^+$ -ATPases (Petschenka et al., 2018).  
446 Remarkably, monarch  $\text{Na}^+/\text{K}^+$ -ATPase is only less than twofold more resistant to the  
447 thiazolidine-ring-containing cardenolides uscharin and voruscharin which dominate the  
448 cardenolide spectrum of *A. curassavica* leaves compared to porcine  $\text{Na}^+/\text{K}^+$ -ATPase (Agrawal  
449 et al., 2021). Consequently, the lack of sequestration of uscharin and voruscharin by monarch  
450 caterpillars, observed in this study, was interpreted as an adaptation to avoid toxicity. However,  
451 due to the high sensitivity of the employed AP-SMALDI MSI system, we were able to detect  
452 and visualize the accumulation of uscharin and voruscharin in the epidermal cells of the  
453 integument (Fig. S20e,f) and LC-MS-based quantification revealed 160 x (uscharin) and 50 x  
454 lower concentrations compared to the predominantly sequestered calotropin (Fig. S19). In  
455 conclusion, our data suggest that uscharin and voruscharin are sequestered but to a  
456 comparatively low extent. Alternatively to representing plant defense compounds specifically  
457 directed against the monarch butterfly, reduced sequestration and limited resistance of  
458 monarch  $\text{Na}^+/\text{K}^+$ -ATPase towards uscharin and voruscharin might be due to the rapid  
459 spontaneous degradation of voruscharin in the caterpillar gut which is also likely for uscharin  
460 due to the high structural similarity. Consequently, these compounds would not be available  
461 as a substrate for sequestration and not exert selection pressure on monarch  $\text{Na}^+/\text{K}^+$ -ATPase.

462         Our MSI analyses indicate that the midgut epithelium plays a critical role regarding the  
463 selectivity of sequestration by prohibiting the uptake of individual cardenolides such as uzarin  
464 (Fig. 5c). For uzarin, metabolism can be ruled out as a factor preventing sequestration, since  
465 this compound was found abundantly in the gut lumen and was observed in direct contact with  
466 the apical surface of the midgut epithelium (Fig. 5c). In other words, we suggest that the midgut  
467 epithelium discriminates against individual compounds by an unknown mechanism. The non-  
468 sequestered biglucoside uzarin (Fig. 5c) was the largest cardenolide detected and is

469 comparatively polar, suggesting that size or polarity could be important determinants. Selective  
470 uptake of structurally different non-milkweed cardenolides was already demonstrated earlier  
471 (Frick and Wink, 1995). Here, we show that also milkweed cardenolides that actually occur in  
472 the diet of the monarch caterpillar are sequestered selectively.

473         Although sequestration of plant toxins was described for more than 275 insect species  
474 involving different classes of chemical compounds (Beran and Petschenka, 2022; Opitz and  
475 Müller, 2009), it is still largely unknown how plant toxins are transported across the insect gut  
476 epithelium (i.e. from the gut lumen into the body cavity). Using high-resolution MSI (10  $\mu\text{m}$  step  
477 size), we were able to detect cardenolides within the midgut epithelium of monarch caterpillars.  
478 Notably, cardenolides appeared in a discrete granular pattern (Figs 5 and S21), suggesting  
479 that cardenolides are transported as aggregates and not as individual molecules. This pattern  
480 might indicate a vesicular transport via transcytosis, similar to what was described for the  
481 uptake of albumin across the midgut of the silkworm (*Bombyx mori*) (Casartelli et al., 2005).  
482 Since this granular pattern of cardenolides was already observed in the midgut lumen, the  
483 putative cardenolide vesicles may be plant derived. Although our histological sections were  
484 comparatively thick and likely contained several layers of cells complicating interpretation, the  
485 uniform distribution of the observed particles suggests that the transport occurs in a trans- and  
486 not in a paracellular fashion. It was suggested earlier that a carrier mechanism mediates the  
487 transport of cardenolides across the midgut epithelium in monarch caterpillars (Frick and Wink,  
488 1995). How the cardenolide aggregations observed here could be aligned with a carrier-  
489 mediated process, however, remains an open question.

490         Remarkably, also other secondary plant metabolites such as polysaccharides and  
491 flavonoids as well as primary metabolites (e.g. guanosine) appeared in the same granular  
492 pattern within the midgut epithelium (Fig S21e-i), suggesting that vesicular uptake is a  
493 universal mode of uptake for various metabolites. A similar pattern was found for *E. core*  
494 regarding these metabolites but remarkably, cardenolides were not detected in the midgut  
495 epithelium (Fig. S22). Lipophilic and amphiphilic allelochemicals are expected to be  
496 sequestered into lipid aggregates (micelles) in the fluid phase of the gut of herbivorous insects  
497 proportionately to their lipophilicity (Barbehenn, 1999). Moreover, micelles formed by the  
498 aggregation of lysophospholipids, galactosyl glycerides, long chain fatty acids, and other  
499 amphiphilic and lipophilic compounds are known to represent the primary constituents of the  
500 non-aqueous phase of the midgut fluid in insect herbivores (Barbehenn, 1999). Therefore, it is  
501 likely that the granules which we observed represent micelles containing cardenolides and  
502 other metabolites. The observation of these putative micelles in the midgut epithelium of  
503 monarch caterpillars suggests that micelles composed of plant lipids and cardenolides which  
504 may cross the midgut epithelium by diffusion, represent the mode of transport by which  
505 cardenolides are sequestered.

506 It is unclear, however, how caterpillars of *E. core* discriminate against the uptake of  
507 cardenolides while apparently taking up other metabolites in a similar fashion. The peritrophic  
508 membrane of grasshoppers has been demonstrated to prevent the uptake of micelles  
509 containing various plant toxins including the cardenolide digitoxin by ultrafiltration (Barbehenn,  
510 1999). This mechanism, however, is unlikely to explain non-sequestration of cardenolides in  
511 *E. core*, since cardenolide granules were observed in close contact with the midgut epithelium  
512 and thus were able to cross the peritrophic membrane surrounding the food bolus (Fig S22). It  
513 rather seems likely that degradation of cardenolides in the fluid-phase of the gut prevents  
514 sequestration of cardenolides in *E. core*.

515 Collectively, our spatially-resolved metabolomics approach revealed novel insight into  
516 the selectivity and the mechanism of cardenolide sequestration as well as of the location of  
517 sequestered cardenolides in monarch butterflies and demonstrates the potential of high-  
518 resolution AP-SMALDI MSI to explore insect-plant interaction biochemistry and to unravel the  
519 spatiotemporal fate of xenobiotics in insects (e.g. insecticides).

## 520 **Materials and Methods**

### 521 **Chemicals, plants and insects**

522 If not stated otherwise, all chemicals were purchased from Sigma-Aldrich (Steinheim,  
523 Germany). Caterpillars of *D. plexippus* (origin Portugal) and *E. core* (origin Southeast Asia) for  
524 AP-SMALDI MSI were obtained commercially, and colonies were maintained in cages in a  
525 greenhouse under ambient conditions. Caterpillars from both species were raised on potted *A.*  
526 *curassavica* plants (grown from seeds of commercial origin), grown in the same greenhouse  
527 and watered, fertilized and pruned as needed. For MSI experiments, actively-feeding final-  
528 instar larvae of *D. plexippus* and *E. core* were directly collected from the plants and stored at  
529  $-80^{\circ}\text{C}$  for no longer than 2 weeks until sample preparation. For regional gut dissection  
530 experiments, caterpillars of *E. core* were raised in the greenhouse as well, while caterpillars of  
531 *D. plexippus* were raised on potted *A. curassavica* plants in a climate chamber (Fitotron® SGC  
532 120, Weiss Technik, Loughborough, UK) at  $26^{\circ}\text{C}$  (day) and  $22^{\circ}\text{C}$  (night) under a 16:8 h  
533 day/night cycle at 60% humidity. Caterpillars for these experiments were raised on individual  
534 plants and leaf samples from each plant were taken for cardenolide quantification.

535 For feeding experiments with cardenolide-free plants, monarch caterpillars (harvested  
536 from *A. curassavica* plants in the greenhouse) were fed with the cardenolide-free (Warashina  
537 and Shirota, 2021) *Oxypetalum coeruleum* (Apocynaceae) for three hours before sampling. In  
538 a preliminary trial, we fed flowers of *A. curassavica* (colored red and yellow) to a last-instar  
539 caterpillar of *D. plexippus* under ambient conditions. After one-hour, colored fecal pellets were  
540 observed indicating a full gut passage. Since caterpillar feeding activity on *O. coeruleum* was  
541 reduced compared to *A. curassavica*, three additional *D. plexippus* caterpillars of a similar size

542 were allowed to feed on *O. coeruleum* for three hours under the same conditions. Caterpillars  
543 of *E. core* were quite hesitant to feed on *O. coeruleum* and only one of three caterpillars finally  
544 accepted *O. coeruleum* and was left on the leaves overnight. After the trials, caterpillars were  
545 frozen at  $-80^{\circ}\text{C}$  and treated as described above. Although the time of *O. coeruleum* feeding  
546 was different for both caterpillar species, only leaf particles of *O. coeruleum* were visible in the  
547 histological sections indicating complete replacement of *A. curassavica* plant material by *O.*  
548 *coeruleum* tissue.

549 *D. plexippus* caterpillars for the LC-MS analyses of isolated caterpillar integuments  
550 were raised on potted *A. curassavica* plants in a greenhouse under ambient conditions and  
551 collected together while actively feeding.

### 552 **Sample preparation for MALDI mass spectrometry imaging**

553 Before cryo-sectioning, caterpillars of *D. plexippus* and *E. core* were transferred to a  
554 cryomicrotome (HM525, Thermo Fisher Scientific, Walldorf, Germany) and allowed to warm  
555 up to  $-25^{\circ}\text{C}$  for 60 minutes. For transversal sectioning, each caterpillar was cut in half and  
556 fixed onto a metal target using freezing water as an adhesive medium (see Figure S23, for a  
557 schematic overview of the complete workflow). Subsequently, transversal sections with  $40\ \mu\text{m}$   
558 thickness were obtained at  $-25^{\circ}\text{C}$ , thaw-mounted onto glass slides and stored at  $-80^{\circ}\text{C}$  until  
559 MSI analysis. All transversal sections were obtained between the first and the second pro-leg  
560 of the caterpillar, to ensure sectioning in the midgut region and to achieve consistent  
561 experimental conditions across all biological replicates of the two species.

562 Whole-insect sectioning (i.e. longitudinal sections) is challenging due to the large size  
563 of final instar *D. plexippus* and *E. core* caterpillars (3 to 5 cm in length). Thus, an MSI-  
564 compatible sample preparation protocol to obtain longitudinal sections of excellent quality was  
565 developed. First, a custom-made cryomold ( $24\ \text{mm} \times 50\ \text{mm} \times 30\ \text{mm}$ ) was filled to one-third  
566 of its volume with aqueous gelatin solution (8% (w/v) for *D. plexippus*, 6% (w/v) for *E. core*)  
567 and transferred to  $-25^{\circ}\text{C}$  for 20 minutes. Then, frozen caterpillars were placed onto the  
568 solidified gelatin block, covered with fresh gelatin solution and immediately snap-frozen in  
569 liquid nitrogen to prevent potential analyte delocalization and tissue damage induced by the  
570 hot gelatin ( $45^{\circ}\text{C}$ ).

571 For sectioning, the frozen gelatin block was transferred to  $-25^{\circ}\text{C}$  for 60 minutes,  
572 subsequently taken out of the cryomold and fixed onto the metal target using freezing water  
573 as an adhesive medium as described above (see Figure S1). Longitudinal sections with  $40\ \mu\text{m}$   
574 thickness were obtained at  $-25^{\circ}\text{C}$  for *D. plexippus* and  $-18^{\circ}\text{C}$  for *E. core*, thaw-mounted  
575 onto glass slides and subsequently stored at  $-80^{\circ}\text{C}$  until MSI analysis. Before matrix  
576 application, tissue sections were brought to room temperature in a desiccator for 30 minutes  
577 to avoid condensation of water at the sample surface. Optical images of tissue sections were

578 obtained using a Keyence VHX-5000 digital microscope (Keyence Deutschland GmbH, Neu-  
579 Isenburg, Germany).

580         Among the MALDI matrices tested (positive-ion mode: 2,5-dihydroxybenzoic acid (2,5-  
581 DHB),  $\alpha$ -cyano-4-hydroxycinnamic acid (CHCA), 2-mercaptobenzothiazol (MBT); negative-ion  
582 mode: 9-aminoacridine (9-AA), bis(dimethylamino)naphthalene (DMAN)), cardenolides were  
583 exclusively detected using 2,5-DHB in positive-ion mode. Before each MSI experiment, a  
584 matrix solution of 30 mg/mL 2,5-DHB (2,5-DHB, for synthesis, Merck, Darmstadt, Germany) in  
585 acetone/water at 1:1 (v/v) with 0.1% trifluoroacetic acid (TFA, for spectroscopy, AppliChem  
586 GmbH, Darmstadt, Germany) was freshly prepared. A volume of 100  $\mu$ L DHB matrix solution  
587 for transversal sections, 130  $\mu$ L for longitudinal sections and 70  $\mu$ L for high-resolution MSI  
588 experiments ( $\leq 10 \mu\text{m}$  step size) was sprayed onto the sample surface at a flow rate of 10  
589  $\mu\text{l}/\text{min}$  (5  $\mu\text{l}/\text{min}$  for high-resolution MSI experiments) using an ultrafine pneumatic sprayer  
590 system (SMALDIPrep, TransMIT GmbH, Giessen, Germany). The nebulizing nitrogen gas  
591 pressure was 1 bar and the rotation was set to 500 rpm. Crystal sizes ( $\leq 10 \mu\text{m}$ ) and  
592 homogeneity of the matrix layer on the sample surface were controlled under the microscope  
593 before MSI analysis.

594         After MSI measurement, specific tissue sections were washed for 2 min with ethanol  
595 (100%) to remove the matrix layer and subsequently stained with hematoxylin and eosin stain  
596 (H&E) for histological classification (Fig. S24).

## 597 **Collection of regional gut samples, integuments, and sample preparation for** 598 **HPLC analysis**

599         Actively feeding last-instar caterpillars (= 5<sup>th</sup> instar) of *D. plexippus* (n = 9) and *E. core* (n = 6)  
600 were collected from *A. curassavica* plants and immersed in crushed ice for 10 min. In addition,  
601 a mature leaf was collected from each plant (n = 9 for *D. plexippus* and n = 6 for *E. core*),  
602 frozen at -80°C and freeze-dried. After chilling, caterpillars were fixed in a dissection tray lined  
603 with Sylgard 184 (Dow Corning, Midland, MI, USA) using insect pins under ice-cold PBS  
604 (phosphate buffered saline; 154 mM NaCl, 5.6 Na<sub>2</sub>HPO<sub>4</sub>, 1.1 mM KH<sub>2</sub>PO<sub>4</sub>, pH 7.4; Roti®-  
605 CELL, Carl Roth, Karlsruhe, Germany). After decapitation, the integument was opened by a  
606 median cut along the dorsum of the caterpillar using micro-scissors. Next, the integument was  
607 fixed at both sides of the caterpillar and all tissues adhering to the gut or floating in the body  
608 cavity were removed (i.e. Malpighian tubules, salivary glands). Subsequently, the preparation  
609 was washed with ice-cold PBS by pouring fresh PBS into the dish at one side while removing  
610 the buffer with an automatic pipettor from the other side of the dish keeping the preparation  
611 permanently submersed under buffer. After washing, the preparation was frozen at -80°C and  
612 eventually freeze-dried for three days. Precipitated salts were carefully removed using a soft

613 brush and the caterpillar gut including its contents was separated into foregut, four equally  
614 sized portions of midgut, and hindgut (see Fig. S25).

615 Gut portions were weighed using an analytical balance and extracted for HPLC-DAD  
616 and HPLC-ESI-MS analysis. Dry gut portions (i.e. the surrounding epithelium and the gut  
617 contents) were transferred into 2 mL screw-cap vials (Sarstedt AG & Co. KG, Nümbrecht,  
618 Germany) and 1 mL methanol containing 0.02 mg/mL of the internal standard digitoxin (Sigma-  
619 Aldrich, Taufkirchen, Germany) was added. After the addition of ca. 900 mg zirconia beads ( $\emptyset$   
620 2.3 mm, BioSpec Products, Inc., Bartlesville, OK, USA), samples were homogenized in a Fast  
621 Prep™ homogenizer (MP Biomedicals, LLC, Solon, OH, US) for two 45-sec cycles at a speed  
622 of 6.5 m/sec. Subsequently, samples were centrifuged at 16,100 x g and supernatants were  
623 transferred into fresh vials. Extraction of the samples was repeated once as described above  
624 using 1 mL methanol without the internal standard and the second supernatant was combined  
625 with the first supernatant. After evaporating samples to dryness under a stream of N<sub>2</sub>, dry  
626 residues were dissolved in 200  $\mu$ L methanol by agitation in the Fast-Prep-24 instrument  
627 (without the addition of beads). Before HPLC-DAD analysis, samples were filtered via  
628 Rotilabo®-syringe filters (nylon, 0.45  $\mu$ m pore size,  $\emptyset$  13 mm, Carl Roth GmbH & Co. KG,  
629 Karlsruhe, Germany).

630 Leaf samples of *A. curassavica* from the experiment with *D. plexippus* were processed  
631 in the same fashion as described for the gut portions using a subset of roughly 50 mg of leaf  
632 material for extraction (49.4 – 52.8 mg). For leaf samples from the experiment with *E. core*,  
633 whole freeze-dried leaves were homogenized in 15 ml tubes containing two ceramic sphere  
634 beads (MP Biomedicals, Eschwege, Germany). We added 2 ml of methanol, containing 0.2  
635 mg/ml of the internal standard digitoxin and samples were homogenized in the Fast-Prep-24  
636 instrument as described above. After centrifugation (10 min at 1,000 x g) and removal of the  
637 supernatant, the extraction procedure was repeated with 2 ml pure methanol. Pooled  
638 supernatants were dried in a vacuum centrifuge and transferred into a 2-ml tube by washing  
639 the original tube with 3 x 500  $\mu$ l methanol. Finally, the samples were processed as described  
640 above for HPLC analysis.

641 For the analyses of *D. plexippus* caterpillar integuments, three final-instar caterpillars  
642 were chilled on ice for 10 min. Subsequently, integuments were dissected, quickly rinsed in  
643 PBS, and adhering PBS was removed by pulling the samples over the edge of a glass beaker.  
644 Integument samples were stored at -80 °C and extracted as described above for gut portions  
645 but resuspended in 100  $\mu$ l methanol instead.

646

647

## 648 **Instrumentation for MALDI mass spectrometry imaging**

649 All MSI measurements were performed using an autofocusing AP-SMALDI5 AF ion source  
650 (TransMIT GmbH, Giessen, Germany) coupled to a Q Exactive HF Orbitrap mass  
651 spectrometer (Thermo Fisher Scientific, Bremen, Germany). For desorption/ionization, 50  
652 laser pulses per pixel at 343 nm and a pulse rate of 100 Hz were focused perpendicular to the  
653 sample surface to an effective ablation spot diameter of  $\sim 5 \mu\text{m}$  (Fig. S26 for laser burn patterns  
654 of MSI experiments conducted with various step sizes). Whole-body and high-resolution ( $5 \mu\text{m}$   
655 to  $10 \mu\text{m}$  step size) MSI experiments were performed using the 3D-surface mode (“pixel-wise  
656 autofocusing”) to keep the MALDI laser focus, fluence and ablation spot size constant for  
657 varying sample surface characteristics (e.g. ingested plant material in the gut lumen or  
658 integument of the caterpillar, Fig S27) and to handle the sample tilt for the longitudinal  
659 caterpillar sections ( $\sim 4 \text{ cm}$  in length). The AP-SMALDI5 AF ion source was operated using the  
660 SMALDIControl software package (TransMIT GmbH, Giessen, Germany). The step size of the  
661 XYZ sample stage was set to the desired pixel size.

662 For all presented AP-SMALDI MSI experiments, the mass spectrometer was operated  
663 in positive-ion mode in a mass-to-charge-ratio ( $m/z$ ) range of 250 to 1000 at a mass resolution  
664 of 240,000 at  $m/z$  200. Internal lock-mass calibration was performed by using the ion signal  
665 from the DHB matrix cluster at  $m/z$  716.12451 ( $[\text{5DHB-4H}_2\text{O}+\text{NH}_4]^+$ ), resulting in a mass  
666 accuracy of less than 2 ppm root mean square error (RMSE) for the whole image (Fig. S28).  
667 The scan speed for MSI experiments was about 1.4 pixel/s. The acceleration voltage was set  
668 to 3 kV. The ion injection time was set to 500 ms. The capillary temperature was  $250 \text{ }^\circ\text{C}$ , and  
669 the S-lens level was set to 100 arbitrary units.

## 670 **Instrumentation for HPLC-DAD and HPLC-ESI-MS**

671 All HPLC-ESI-MS experiments were performed using a Dionex UltiMate 3000 HPLC  
672 instrument (Thermo Fisher Scientific, Massachusetts, USA) coupled to a Q Exactive HF-X  
673 Orbitrap mass spectrometer (Thermo Fisher Scientific, Bremen, Germany). Analytes were  
674 separated on a Kinetex<sup>®</sup> C18 reversed-phase column ( $2.6 \mu\text{m}$ ,  $100 \times 2.1 \text{ mm}$ , Phenomenex,  
675 Torrance, USA). The injection volume was  $15 \mu\text{L}$ , and the column compartment was set to  $30$   
676  $^\circ\text{C}$  and  $50 \text{ }^\circ\text{C}$ , respectively. Mobile phase A was water (0.1 % FA) and mobile phase B was  
677 acetonitrile (0.1 % FA). The following gradient was used at a flow rate of  $0.5 \text{ mL/min}$ : 0–2 min,  
678 10% B; 2–20 min, 20–70% B; 20–25 min, 70–95% B; 25–30 min, 95% B; 30–35 min,  
679 95–10% B. The mass spectrometer was operated in positive-ion mode in a mass-to-charge-  
680 ratio ( $m/z$ ) range of 250 to 1000 at a mass resolution of 240,000 at  $m/z$  200. The following  
681 HESI-source parameters were applied: spray voltage (+), 3.5 kV; capillary temperature,  $300$   
682  $^\circ\text{C}$ ; sheath gas flow rate, 35 psi; aux gas flowrate, 12 psi; aux gas heater temperature,  $150 \text{ }^\circ\text{C}$ .  
683 Normalized collision energy (NCE) of 25% was used for fragmentation with  $z = 1$  as default



684 charge state. In total, three biological replicates of every sample type were measured (regional  
685 gut samples from *D. plexippus* and *E. core*; *D. plexippus* midgut tissue, integument; *A.*  
686 *curassavica* leaf).

687 For HPLC-DAD analyses, we injected 15  $\mu$ l of extract into an Agilent 1100 series HPLC  
688 (Agilent Technologies, Santa Clara, USA) and compounds were separated on an EC 250/4.6  
689 NUCLEODUR® C18 Gravity column (3  $\mu$ m, 250 mm x 4.6 mm, Macherey-Nagel, Düren,  
690 Germany). Cardenolides were eluted at a constant flow of 0.7 ml/min at room temperature with  
691 an acetonitrile–H<sub>2</sub>O gradient as follows: 0–1 min 20% acetonitrile, 31 min 30% acetonitrile, 47  
692 min 50% acetonitrile, 49 min 95% acetonitrile, 54 min 95% acetonitrile, 55 min 20% acetonitrile  
693 reconditioning for 10 min at 16% acetonitrile. UV-absorbance spectra were recorded from 200  
694 to 400 nm with a diode array detector.

## 695 Data processing

696 Xcalibur (Thermo Fisher Scientific, Massachusetts, USA) was used to display mass spectra.  
697 Ion images of selected  $m/z$  values were generated using MIRION imaging software (Paschke  
698 et al., 2013) (TransMIT GmbH, Giessen, Germany). The general principle for image generation  
699 is displayed in Figure S29. The ion-selection bin width ( $\Delta(m/z)$ ) of the images, generated from  
700 the MS data was set to  $\Delta(m/z) = 0.01$ . Images were normalized to the base pixel (highest  
701 intensity of  $m/z$  bin) per image if not stated differently. No further data manipulation steps, such  
702 as smoothing or interpolation, were used. RGB MS images were obtained by selecting and  
703 overlaying three different images for the red-green-blue channels. The resulting images were  
704 adjusted in brightness for optimal visualization. MS imaging data were also converted to imzML  
705 using RAW2IMZML (TransMIT GmbH, Giessen, Germany), and MSiReader (Robichaud et al.,  
706 2013) was used to extract the ion intensities of specific  $m/z$  bins for defined regions of interest  
707 in the image. Metabolites and lipids were assigned and identified based on accurate mass  
708 measurements with a mass tolerance of less than 2 ppm RMSE for the whole image, MS/MS  
709 experiments and database matches (Palmer et al., 2017). For instance, calotropin/calactin  
710 ( $[M+K]^+$ ) at  $m/z$  571.2304 was detected with a mass error of 0.5 ppm, and a root mean square  
711 error (RMSE) of 1.6 ppm (see Fig. S28a for RMSE plot).

712 For relative quantification of cardenolides based on MSI data, we defined seven regions  
713 of interest *in silico* (focused on *A. curassavica* leaf material and surrounding cardenolide  
714 signals; see Fig. S9 for a representative example based on biological replicate 1 of *D.*  
715 *plexippus* and *E. core*) per biological replicate and extracted the ion intensities for  
716 calotropin/calactin, calotoxin, uscharidin, frugoside and asclepin. Throughout all MSI  
717 experiments, pheophytin a was homogeneously distributed and detected with marginal intensity  
718 variance in *A. curassavica* leaf pieces in *D. plexippus* and *E. core* gut lumen. Thus, for better  
719 comparison, we utilized the plant tissue marker pheophytin a as an internal standard and

720 normalized the average cardenolide signal abundance to the average pheophytin a signal  
721 abundance for the respective region of interest.

722 For HPLC-MS based quantification, MZmine 2 (Pluskal et al., 2010) was used for  
723 preprocessing and extracting the area under the peak (AUP) of cardenolide features in the  
724 chromatogram. Subsequently, the respective cardenolide AUP was normalized to the AUP of  
725 the internal standard (Digitoxin) and the corresponding extracted tissue weight.

726 Data from HPLC-DAD analyses were evaluated using Agilent ChemStation (Rev.  
727 B.04.03, Agilent Technologies, Santa Clara, USA). Peaks with symmetrical absorption maxima  
728 between 216 and 222 nm (Malcolm and Zalucki, 1996) were interpreted as cardenolides and  
729 integrated at 218 nm. For gut samples obtained from dissections of freeze-dried caterpillars,  
730 we quantified cardenolides based on the peak area of the known concentration of the internal  
731 standard digitoxin. For leaf samples of *A. curassavica*, digitoxin was co-eluting with an  
732 endogenous cardenolide peak. Therefore, we used the mean of all digitoxin peak areas from  
733 the *E. core* gut samples (n = 36) which were run in the same batch for calibration of the leaf  
734 samples. Leaf samples collected during our experiment with *D. plexippus* were measured  
735 several months after the *D. plexippus* gut samples. Hence, cardenolides in these leaf samples  
736 were quantified using a digitoxin calibration curve which was measured shortly after the leaf  
737 samples were analyzed. Cardenolide concentrations of all leaf samples were corrected for the  
738 known amount of digitoxin which had been added initially as an internal standard. For  
739 caterpillar gut samples and leaf samples of *A. curassavica*, only peaks were considered which  
740 were present and had a clear cardenolide spectrum in at least 50 % of all samples. The  
741 observed pattern of results (see results section) did not change, when all peaks showing a  
742 clear cardenolide spectrum in each sample were considered for quantification.

## 743 **Statistical Analysis**

744 We compared the cardenolide concentrations of dissected gut portions and leaf material using  
745 the standard least squares model in JMP Pro 15 (SAS Institute, Cary, NC, USA) including  
746 caterpillar individual as a model effect. For the *D. plexippus* dataset, data were log<sub>10</sub>-  
747 transformed to achieve normality of residuals and homogeneity of variance. For comparing  
748 intensities of cardenolide signals *in silico*, we calculated means of all seven ROIs for each  
749 cardenolide in each caterpillar. Means for each cardenolide were compared between  
750 caterpillar species using t-tests assuming unequal variances in JMP Pro 15. P-values < 0.05  
751 were considered statistically significant.

752

753

754

755 **Acknowledgements**

756 We thank Hermann Falkenhahn, Johanna Weber, and Sabrina Stiehler for insect rearing,  
757 growing of plants and collecting samples. Technical support by Thermo Fisher Scientific GmbH  
758 (Bremen, Germany) and TransMIT GmbH (Giessen, Germany) are gratefully acknowledged.  
759 This research was funded by DFG grant PE 2059/3-1 to G.P. and the LOEWE Program of the  
760 State of Hesse by funding the LOEWE Center for Insect Biotechnology and Bioresources.

761 **Author contributions**

762 G.P., B.S. and D.D. designed research, D.D., G.P., A.B., L.T. and D.B. performed research,  
763 D.D. and G.P. analyzed data, D.D., G.P., B.S., and A.V. wrote the paper.

764 **Competing interests**

765 B.S. is a consultant, and D.D. is a part-time employee of TransMIT GmbH, Giessen, Germany.  
766 All other authors declare no conflicts of interest.

767 **Data availability**

768 All underlying data will be made available upon acceptance of the manuscript.

769

770

771

772

773

774

775

776

777

778

779

780

781

## 782 References

- 783 Abdalsamee MK, Giampà M, Niehaus K, Müller C. 2014. Rapid incorporation of  
784 glucosinolates as a strategy used by a herbivore to prevent activation by  
785 myrosinases. *Insect Biochem Mol Biol* **52**:115–123.  
786 doi:<https://doi.org/10.1016/j.ibmb.2014.07.002>
- 787 Agrawal AA, Böröczky K, Haribal M, Hastings AP, White RA, Jiang R-W, Duplais C.  
788 2021. Cardenolides, toxicity, and the costs of sequestration in the coevolutionary  
789 interaction between monarchs and milkweeds. *Proc Natl Acad Sci*  
790 **118**:e2024463118. doi:10.1073/pnas.2024463118
- 791 Agrawal AA, Petschenka G, Bingham RA, Weber MG, Rasmann S. 2012. Toxic  
792 cardenolides: chemical ecology and coevolution of specialized plant–herbivore  
793 interactions. *New Phytol* **194**:28–45. doi:[https://doi.org/10.1111/j.1469-](https://doi.org/10.1111/j.1469-8137.2011.04049.x)  
794 [8137.2011.04049.x](https://doi.org/10.1111/j.1469-8137.2011.04049.x)
- 795 Ayres MP, Clausen TP, MacLean Jr SF, Redman AM, Reichardt PB. 1997. Diversity  
796 of structure and antiherbivore activity in condensed tannins. *Ecology* **78**:1696–  
797 1712.
- 798 Barbehenn R V. 1999. Non-absorption of ingested lipophilic and amphiphilic  
799 allelochemicals by generalist grasshoppers: The role of extractive ultrafiltration  
800 by the peritrophic envelope. *Arch Insect Biochem Physiol* **42**:130–137.  
801 doi:[https://doi.org/10.1002/\(SICI\)1520-6327\(199910\)42:2<130::AID-](https://doi.org/10.1002/(SICI)1520-6327(199910)42:2<130::AID-ARCH3>3.0.CO;2-C)  
802 [ARCH3>3.0.CO;2-C](https://doi.org/10.1002/(SICI)1520-6327(199910)42:2<130::AID-ARCH3>3.0.CO;2-C)
- 803 Beran F, Pauchet Y, Kunert G, Reichelt M, Wielsch N, Vogel H, Reinecke A, Svatoš  
804 A, Mewis I, Schmid D, Ramasamy S, Ulrichs C, Hansson BS, Gershenson J,  
805 Heckel DG. 2014. &em>&Phyllotreta striolata&lt;/em>; flea beetles use host  
806 plant defense compounds to create their own glucosinolate-myrosinase system.  
807 *Proc Natl Acad Sci* **111**:7349 LP – 7354. doi:10.1073/pnas.1321781111
- 808 Beran F, Petschenka G. 2022. Sequestration of Plant Defense Compounds by  
809 Insects: From Mechanisms to Insect–Plant Coevolution. *Annu Rev Entomol*  
810 **67**:163–180. doi:10.1146/annurev-ento-062821-062319
- 811 Brower LP, Ryerson WN, Coppinger LL, Glazier SC. 1968. Ecological chemistry and  
812 the palatability spectrum. *Science (80- )* **161**:1349–1350.
- 813 Buchberger AR, DeLaney K, Johnson J, Li L. 2018. Mass Spectrometry Imaging: A  
814 Review of Emerging Advancements and Future Insights. *Anal Chem* **90**:240–  
815 265. doi:10.1021/acs.analchem.7b04733
- 816 Casartelli M, Corti P, Giovanna Leonardi M, Fiandra L, Burlini N, Pennacchio F,  
817 Giordana B. 2005. Absorption of albumin by the midgut of a lepidopteran larva. *J*  
818 *Insect Physiol* **51**:933–940. doi:<https://doi.org/10.1016/j.jinsphys.2005.04.008>
- 819 Cresswell JE, Merritt SZ, Martin MM. 1992. The effect of dietary nicotine on the  
820 allocation of assimilated food to energy metabolism and growth in fourth-instar  
821 larvae of the southern armyworm, *Spodoptera eridania* (Lepidoptera: Noctuidae).  
822 *Oecologia* **89**:449–453.
- 823 Dobler S, Dalla S, Wagschal V, Agrawal AA. 2012. Community-wide convergent

- 824 evolution in insect adaptation to toxic cardenolides by substitutions in the Na, K-  
825 ATPase. *Proc Natl Acad Sci* **109**:13040–13045.
- 826 Dobler S, Petschenka G, Wagschal V, Flacht L. 2015. Convergent adaptive evolution  
827 – how insects master the challenge of cardiac glycoside-containing host plants.  
828 *Entomol Exp Appl* **157**:30–39. doi:<https://doi.org/10.1111/eea.12340>
- 829 Duffey SS. 1980. Sequestration of plant natural products by insects. *Annu Rev*  
830 *Entomol* **25**:447–477.
- 831 Dussourd DE, Hoyle AM. 2000. Poisoned plusiines: toxicity of milkweed latex and  
832 cardenolides to some generalist caterpillars. *Chemoecology* **10**:11–16.  
833 doi:10.1007/PL00001810
- 834 Fraenkel GS. 1959. The Raison d'Être of Secondary Plant Substances: These odd  
835 chemicals arose as a means of protecting plants from insects and now guide  
836 insects to food. *Science (80- )* **129**:1466–1470.
- 837 Frick C, Wink M. 1995. Uptake and sequestration of ouabain and other cardiac  
838 glycosides in *Danaus plexippus* (Lepidoptera: Danaidae): evidence for a carrier-  
839 mediated process. *J Chem Ecol* **21**:557–575.
- 840 Geier B, Oetjen J, Ruthensteiner B, Polikarpov M, Gruber-Vodicka H, Liebeke M.  
841 2021. Connecting structure and function from organisms to molecules in small  
842 animal symbioses through chemo-histo-tomography. *bioRxiv* 2009–2020.
- 843 Geier B, Sogin EM, Michellod D, Janda M, Kompauer M, Spengler B, Dubilier N,  
844 Liebeke M. 2020. Spatial metabolomics of in situ host–microbe interactions at  
845 the micrometre scale. *Nat Microbiol* **5**:498–510.
- 846 Holzinger F, Wink M. 1996. Mediation of cardiac glycoside insensitivity in the  
847 monarch butterfly (*Danaus plexippus*): role of an amino acid substitution in the  
848 ouabain binding site of Na<sup>+</sup>, K<sup>+</sup>-ATPase. *J Chem Ecol* **22**:1921–1937.
- 849 Iwama T, Kano K, Saigusa D, Ekroos K, van Echten-Deckert G, Vogt J, Aoki J. 2021.  
850 Development of an On-Tissue Derivatization Method for MALDI Mass  
851 Spectrometry Imaging of Bioactive Lipids Containing Phosphate Monoester  
852 Using Phos-tag. *Anal Chem* **93**:3867–3875.
- 853 Joo C, Balci H, Ishitsuka Y, Buranachai C, Ha T. 2008. Advances in Single-Molecule  
854 Fluorescence Methods for Molecular Biology. *Annu Rev Biochem* **77**:51–76.  
855 doi:10.1146/annurev.biochem.77.070606.101543
- 856 Kadesch P, Hollubarsch T, Gerbig S, Schneider L, Silva LMR, Hermosilla C, Taubert  
857 A, Spengler B. 2020a. Intracellular parasites *Toxoplasma gondii* and *Besnoitia*  
858 *besnoiti*, Unveiled in single host cells using AP-SMALDI MS imaging. *J Am Soc*  
859 *Mass Spectrom* **31**:1815–1824.
- 860 Kadesch P, Quack T, Gerbig S, Grevelding CG, Spengler B. 2020b. Tissue- and sex-  
861 specific lipidomic analysis of *Schistosoma mansoni* using high-resolution  
862 atmospheric pressure scanning microprobe matrix-assisted laser  
863 desorption/ionization mass spectrometry imaging. *PLoS Negl Trop Dis*  
864 **14**:e0008145.

- 865 Kadesch P, Quack T, Gerbig S, Grevelding CG, Spengler B. 2019. Lipid Topography  
866 in *Schistosoma mansoni* Cryosections, Revealed by Microembedding and High-  
867 Resolution Atmospheric-Pressure Matrix-Assisted Laser Desorption/Ionization  
868 (MALDI) Mass Spectrometry Imaging. *Anal Chem* **91**:4520–4528.
- 869 Karageorgi M, Groen SC, Sumbul F, Pelaez JN, Verster KI, Aguilar JM, Hastings AP,  
870 Bernstein SL, Matsunaga T, Astourian M, Guerra G, Rico F, Dobler S, Agrawal  
871 AA, Whiteman NK. 2019. Genome editing retraces the evolution of toxin  
872 resistance in the monarch butterfly. *Nature* **574**:409–412. doi:10.1038/s41586-  
873 019-1610-8
- 874 Kazana E, Pope TW, Tibbles L, Bridges M, Pickett JA, Bones AM, Powell G, Rossiter  
875 JT. 2007. The cabbage aphid: a walking mustard oil bomb. *Proc R Soc B Biol  
876 Sci* **274**:2271–2277. doi:10.1098/rspb.2007.0237
- 877 Kherlopian AR, Song T, Duan Q, Neimark MA, Po MJ, Gohagan JK, Laine AF. 2008.  
878 A review of imaging techniques for systems biology. *BMC Syst Biol* **2**:1–18.
- 879 Koestler M, Kirsch D, Hester A, Leisner A, Guenther S, Spengler B. 2008. A high-  
880 resolution scanning microprobe matrix-assisted laser desorption/ionization ion  
881 source for imaging analysis on an ion trap/Fourier transform ion cyclotron  
882 resonance mass spectrometer. *Rapid Commun Mass Spectrom An Int J  
883 Devoted to Rapid Dissem Up-to-the-Minute Res Mass Spectrom* **22**:3275–3285.
- 884 Koiwa H, Bressan RA, Hasegawa PM. 1997. Regulation of protease inhibitors and  
885 plant defense. *Trends Plant Sci* **2**:379–384.
- 886 Kompauer M, Heiles S, Spengler B. 2017a. Atmospheric pressure MALDI mass  
887 spectrometry imaging of tissues and cells at 1.4- $\mu$ m lateral resolution. *Nat  
888 Methods* **14**:90–96. doi:10.1038/nmeth.4071
- 889 Kompauer M, Heiles S, Spengler B. 2017b. Autofocusing MALDI mass spectrometry  
890 imaging of tissue sections and 3D chemical topography of nonflat surfaces. *Nat  
891 Methods* **14**:1156–1158.
- 892 Malcolm SB, Zalucki MP. 1996. Milkweed latex and cardenolide induction may  
893 resolve the lethal plant defence paradox Proceedings of the 9th International  
894 Symposium on Insect-Plant Relationships. Springer. pp. 193–196.
- 895 Malcom S, Rothschild M. 1983. A danaid mullerian mimic, *Euploea core amymone*  
896 (Cramer) lacking cardenolides in the pupal and adult stages. *Biol J Linn Soc*  
897 **19**:27–33. doi:10.1111/j.1095-8312.1983.tb00774.x
- 898 Marty MA, Krieger RI. 1984. Metabolism of uscharidin, a milkweed cardenolide, by  
899 tissue homogenates of monarch butterfly larvae, *Danaus plexippus* L. *J Chem  
900 Ecol* **10**:945–956.
- 901 Narberhaus I, Zintgraf V, Dobler S. 2005. Pyrrolizidine alkaloids on three trophic  
902 levels—evidence for toxic and deterrent effects on phytophages and predators.  
903 *Chemoecology* **15**:121–125.
- 904 Opitz SEW, Müller C. 2009. Plant chemistry and insect sequestration. *Chemoecology*  
905 **19**:117–154.

- 906 Palmer A, Phapale P, Chernyavsky I, Lavigne R, Fay D, Tarasov A, Kovalev V,  
907 Fuchser J, Nikolenko S, Pineau C. 2017. FDR-controlled metabolite annotation  
908 for high-resolution imaging mass spectrometry. *Nat Methods* **14**:57–60.
- 909 Parsons JA. 1965. A digitalis-like toxin in the monarch butterfly, *Danaus plexippus* L.  
910 *J Physiol* **178**:290–304. doi:<https://doi.org/10.1113/jphysiol.1965.sp007628>
- 911 Paschke C, Leisner A, Hester A, Maass K, Guenther S, Bouschen W, Spengler B.  
912 2013. Mirion—a software package for automatic processing of mass  
913 spectrometric images. *J Am Soc Mass Spectrom* **24**:1296–1306.
- 914 Petschenka G, Agrawal AA. 2015. Milkweed butterfly resistance to plant toxins is  
915 linked to sequestration, not coping with a toxic diet. *Proc R Soc B Biol Sci*  
916 **282**:20151865.
- 917 Petschenka G, Fei CS, Araya JJ, Schröder S, Timmermann BN, Agrawal AA. 2018.  
918 Relative selectivity of plant cardenolides for Na<sup>+</sup>/K<sup>+</sup>-ATPases from the monarch  
919 butterfly and non-resistant insects. *Front Plant Sci* **9**:1424.
- 920 Pluskal T, Castillo S, Villar-Briones A, Orešič M. 2010. MZmine 2: Modular framework  
921 for processing, visualizing, and analyzing mass spectrometry-based molecular  
922 profile data. *BMC Bioinformatics* **11**:395. doi:10.1186/1471-2105-11-395
- 923 Reichstein T von, Von Euw J, Parsons JA, Rothschild M. 1968. Heart poisons in the  
924 monarch butterfly. *Science (80- )* **161**:861–866.
- 925 Robert CAM, Zhang X, Machado RAR, Schirmer S, Lori M, Mateo P, Erb M,  
926 Gershenzon J. 2017. Sequestration and activation of plant toxins protect the  
927 western corn rootworm from enemies at multiple trophic levels. *Elife* **6**:e29307.  
928 doi:10.7554/eLife.29307
- 929 Robichaud G, Garrard KP, Barry JA, Muddiman DC. 2013. MSiReader: an open-  
930 source interface to view and analyze high resolving power MS imaging files on  
931 Matlab platform. *J Am Soc Mass Spectrom* **24**:718–721.
- 932 Schatzmann HJ. 1953. Herzglykoside als Hemmstoffe für den activen Kalium und  
933 Natrium-Transport durch die Erythrocytemembran. *Helv physiol pharmacol Acta*  
934 **11**:346–354.
- 935 Seiber JN, Tuskes PM, Brower LP, Nelson CJ. 1980. Pharmacodynamics of some  
936 individual milkweed cardenolides fed to larvae of the monarch butterfly (*Danaus*  
937 *plexippus* L.). *J Chem Ecol* **6**:321–339.
- 938 Spengler B. 2015. Mass Spectrometry Imaging of Biomolecular Information. *Anal*  
939 *Chem* **87**:64–82. doi:10.1021/ac504543v
- 940 Spengler B, Hubert M. 2002. Scanning microprobe matrix-assisted laser desorption  
941 ionization (SMALDI) mass spectrometry: instrumentation for sub-micrometer  
942 resolved LDI and MALDI surface analysis. *J Am Soc Mass Spectrom* **13**:735–  
943 748.
- 944 Spengler B, Hubert M, Kaufmann R. 1994. MALDI ion imaging and biological ion  
945 imaging with a new scanning UV-laser microprobe Proceedings of the 42nd  
946 Annual Conference on Mass Spectrometry and Allied Topics. Chicago. p. 1041.

- 947 van Hove ERA, Smith DF, Heeren RMA. 2010. A concise review of mass  
948 spectrometry imaging. *J Chromatogr A* **1217**:3946–3954.
- 949 Vaughan GL, Jungreis AM. 1977. Insensitivity of lepidopteran tissues to ouabain:  
950 physiological mechanisms for protection from cardiac glycosides. *J Insect*  
951 *Physiol* **23**:585–589.
- 952 Warashina T, Shiota O. 2021. Tetracyclic Triterpenoids, Steroids and Lignanes from  
953 the Aerial Parts of *Oxypetalum caeruleum*. *Chem Pharm Bull* **69**:226–231.  
954 doi:10.1248/cpb.c20-00789
- 955 Yang F, Chen J, Ruan Q, Saqib HSA, He W, You M. 2020. Mass spectrometry  
956 imaging: An emerging technology for the analysis of metabolites in insects. *Arch*  
957 *Insect Biochem Physiol* **103**:e21643.
- 958 Yang Z-L, Nour-Eldin HH, Hänniger S, Reichelt M, Crocoll C, Seitz F, Vogel H, Beran  
959 F. 2021. Sugar transporters enable a leaf beetle to accumulate plant defense  
960 compounds. *Nat Commun* **12**:2658. doi:10.1038/s41467-021-22982-8
- 961 Zhang R-R, Tian H-Y, Tan Y-F, Chung T-Y, Sun X-H, Xia X, Ye W-C, Middleton DA,  
962 Fedosova N, Esmann M, Tzen JTC, Jiang R-W. 2014. Structures,  
963 chemotaxonomic significance, cytotoxic and Na<sup>+</sup>,K<sup>+</sup>-ATPase inhibitory activities  
964 of new cardenolides from *Asclepias curassavica*. *Org Biomol Chem* **12**:8919–  
965 8929. doi:10.1039/C4OB01545B
- 966 Züst T, Petschenka G, Hastings AP, Agrawal AA. 2019. Toxicity of Milkweed Leaves  
967 and Latex: Chromatographic Quantification Versus Biological Activity of  
968 Cardenolides in 16 *Asclepias* Species. *J Chem Ecol* **45**:50–60.  
969 doi:10.1007/s10886-018-1040-3
- 970
